# Supplementary material for: β-Bis-CF3-substituted phosphorus corroles, theory and experiments
Source: Royal Society of Chemistry journal article supplement (doi:10.1039/d1qi01620b), 2022-01-01
Supplement: d1qi01620b1.pdf [file d1qi01620b1.pdf]

## **$\beta$ -disubstituted Phosphorous Corroles**

Xuan Zhan<sup>a,ff</sup>, Zakir Ullah<sup>b†</sup>, Donghyeon Kim<sup>c</sup>, Bilal Mustafa<sup>b</sup>, Hyungwook Kwon<sup>b\*</sup>,  
David G. Churchill<sup>c,d,e\*</sup> and Zeev Gross<sup>a\*</sup>

(a) Schulich Faculty of Chemistry, Technion–Israel Institute of Technology, Haifa 320000, Israel

(b) Convergence Research Center for Insect Vectors, Incheon National University, 119 Academy-ro, Yeonsu-gu, Incheon, 22012, South Korea.

(c) Department of Chemistry, Korea Advanced Institute of Science and Technology (KAIST), Daejeon 34141, Republic of Korea

(d) Center for Catalytic Hydrocarbon Functionalizations, Institute for Basic Science (IBS), Daejeon 34141, Republic of Korea.

(e) KAIST Institute for Health Science and Technology (KIHST) (Therapeutic Bioengineering Section), 291 Daehak-ro, Yuseong-gu, Daejeon 34141, Republic of Korea.

(f) Current affiliation: School of Life and Health Sciences, The Chinese University of Hong Kong, Shenzhen (CUHK-Shenzhen), 2001 Longxiang Blvd., Longgang Dist., Shenzhen, Guangdong, 518172, P. R. China

† These authors contribute equally

**Emails of corresponding authors:** [david.churchill.korea@gmail.com](mailto:david.churchill.korea@gmail.com), [hwkwon@inu.ac.kr](mailto:hwkwon@inu.ac.kr),  
[chr10zg@technion.ac.il](mailto:chr10zg@technion.ac.il)

---

| <b>Table of contents</b> |                                                         | <b>Page number</b> |
|--------------------------|---------------------------------------------------------|--------------------|
| Fig S1                   | The <sup>1</sup> H-NMR spectrum of <b>2b</b>            | 3                  |
| Fig S2                   | The <sup>19</sup> F-NMR spectrum of <b>2b</b>           | 3                  |
| Fig S3                   | The APCI mass spectrum of <b>2b</b>                     | 4                  |
| Fig S4                   | The <sup>1</sup> H-NMR spectrum of <b>2c</b>            | 5                  |
| Fig S5                   | The <sup>19</sup> F-NMR spectrum of <b>2c</b>           | 5                  |
| Fig S6                   | The APCI mass spectrum of <b>2c</b>                     | 6                  |
| Fig S7                   | The <sup>1</sup> H-NMR spectrum of <b>2d</b>            | 7                  |
| Fig S8                   | The <sup>19</sup> F-NMR spectrum of <b>2d</b>           | 7                  |
| Fig S9                   | The APCI mass spectrum of <b>2d</b>                     | 8                  |
| Fig S10                  | The <sup>1</sup> H-NMR spectrum of <b>2e</b>            | 9                  |
| Fig S11                  | The <sup>19</sup> F-NMR spectrum of <b>2e</b>           | 9                  |
| Fig S12                  | The APCI mass spectrum of <b>2e</b>                     | 10                 |
| Fig S13                  | The <sup>1</sup> H-NMR spectrum of <b>2f</b>            | 11                 |
| Fig S14                  | The <sup>19</sup> F-NMR spectrum of <b>2f</b>           | 11                 |
| Fig S15                  | The APCI mass spectrum of <b>2f</b>                     | 12                 |
| Fig S16                  | Calculated HOMO, LUMO and HOMO – LUMO band gap energies | 12                 |
| Fig S17                  | Calculated HOMO-1, LUMO+1 and their band gap energies   | 13                 |
| Fig S18                  | Calculated UV-vis and fluorescence emission spectra     | 13                 |
| Fig S19                  | Assignment work flow chart                              | 14                 |
| Fig S20                  | NMR assignments with reasons clarified                  | 15                 |
| Fig S21                  | DFT calculated dipole moments                           | 16                 |
|                          | Cartesian Coordinates of Optimized Geometries           | 16-31              |

---

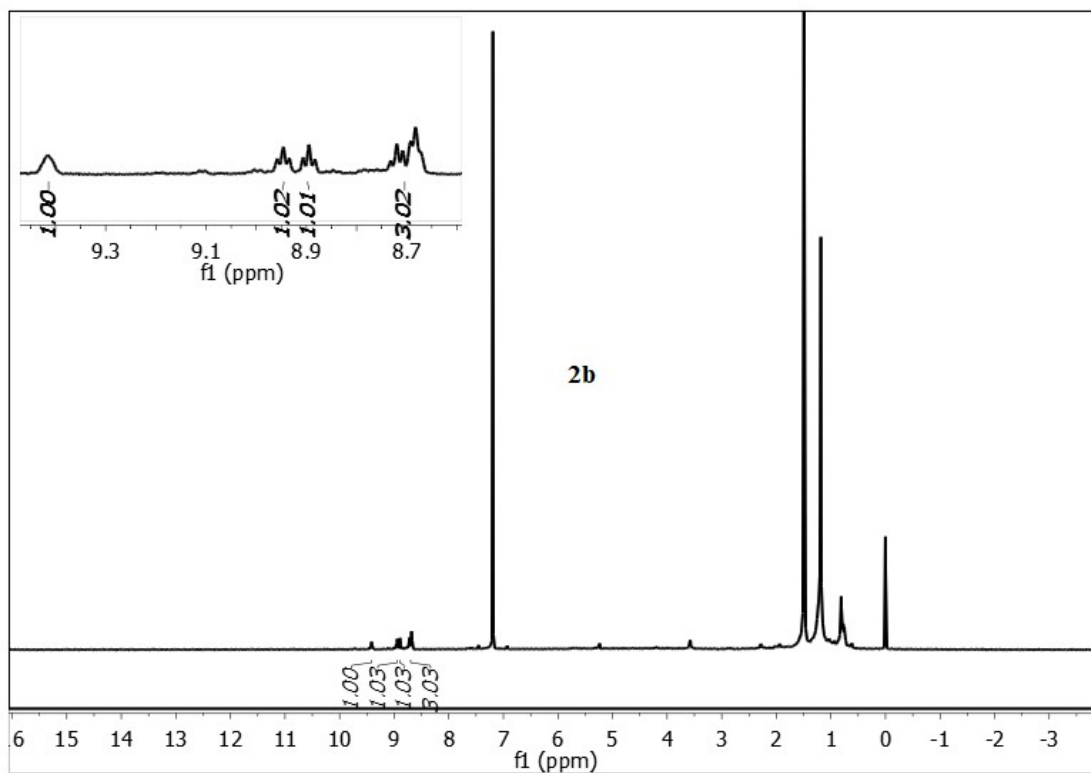

Fig S1. The  $^1\text{H}$ -NMR spectrum of 2b.

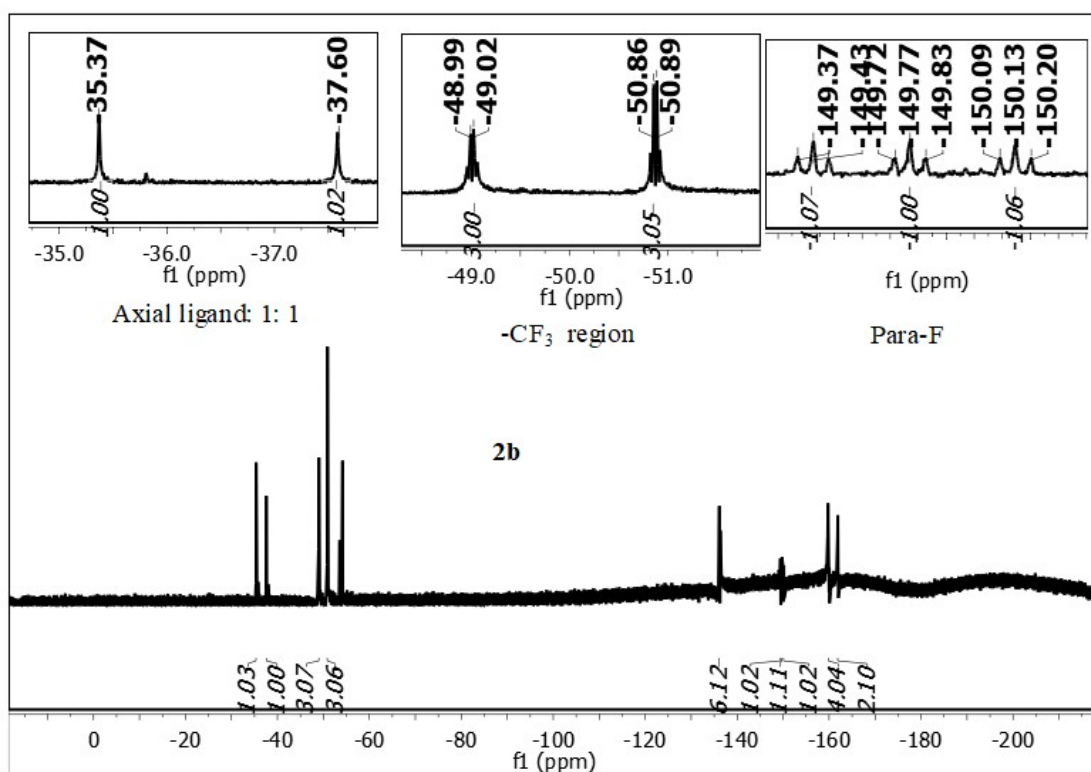

Fig S2. The  $^{19}\text{F}$ -NMR spectrum of 2b

## Generic Display Report

Analysis Info  
Analysis Name D:\Data\Gross\Gr\_5044n000002.d  
Method APCI\_neg\_SolidProbe.m  
Sample Name R806  
Comment

Acquisition Date 6/25/2017 4:37:47 PM  
Operator Larisa Panz  
Instrument maXis impact

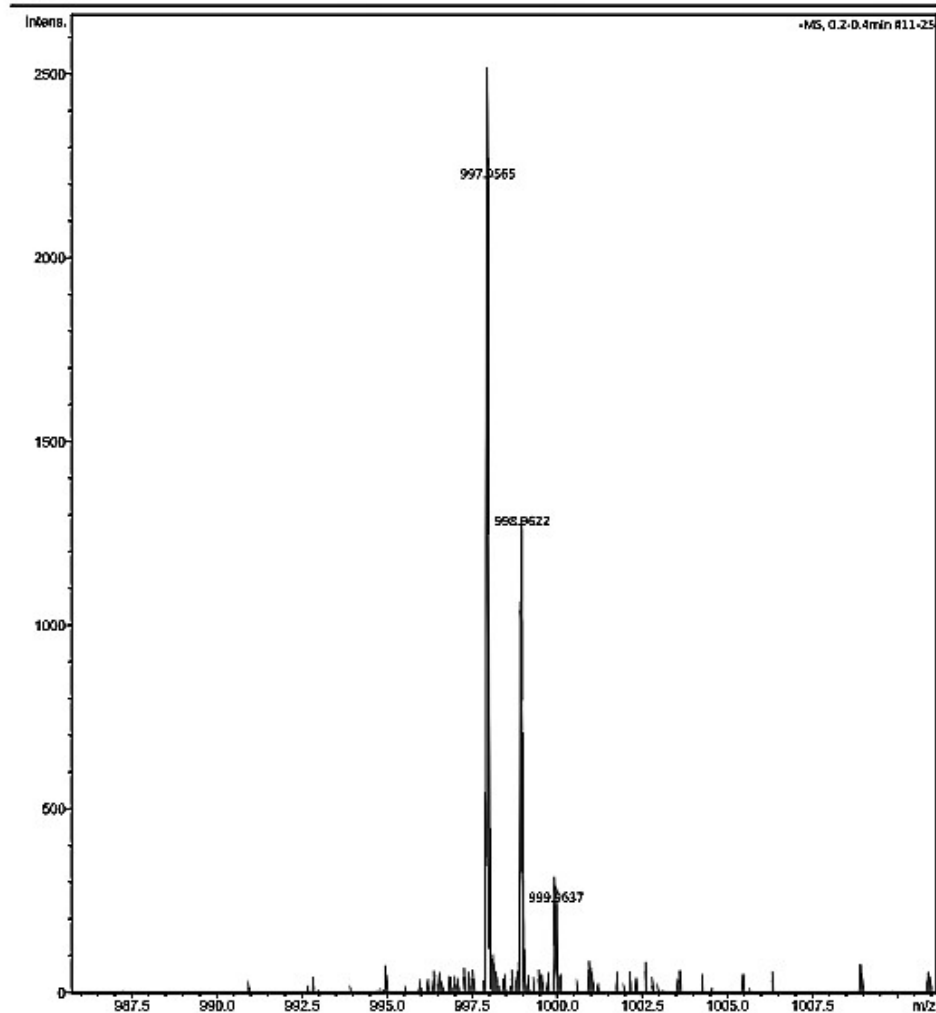

Bruker Compass DataAnalysis 4.2 printed: 6/25/2017 4:39:02 PM by: Larisa Panz Page 1 of 1

**Fig S3.** The APCI mass spectrum of **2b**.

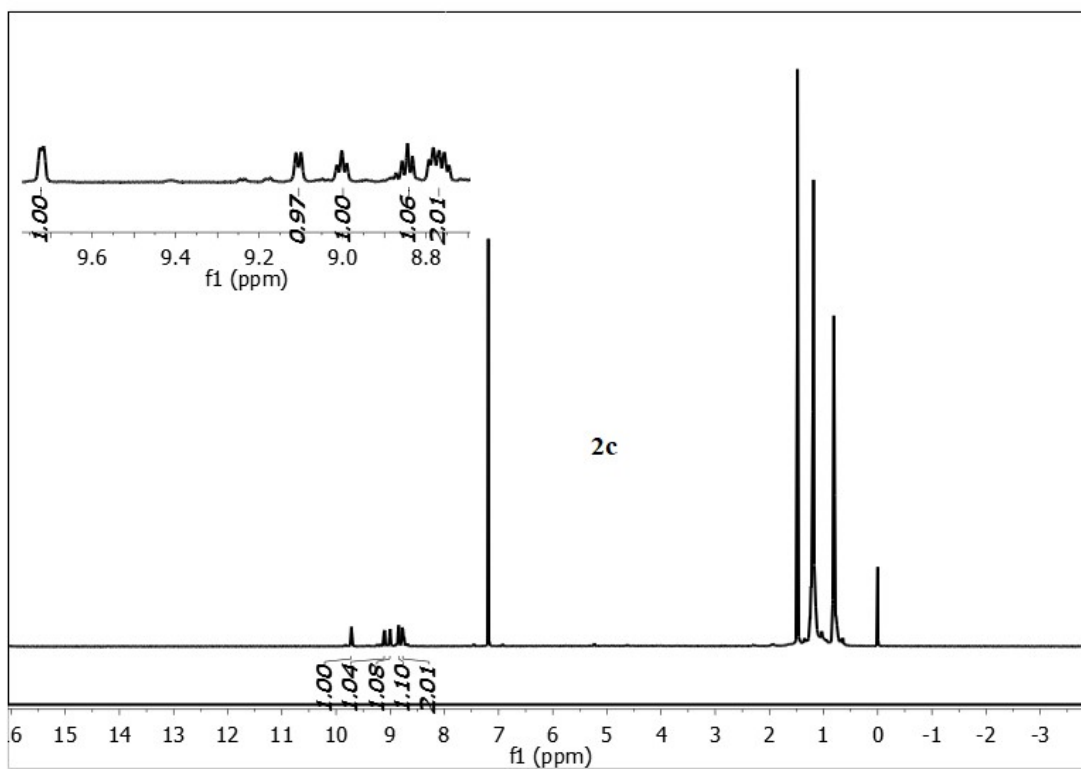

Fig S4. The  $^1\text{H-NMR}$  spectrum of **2c**.

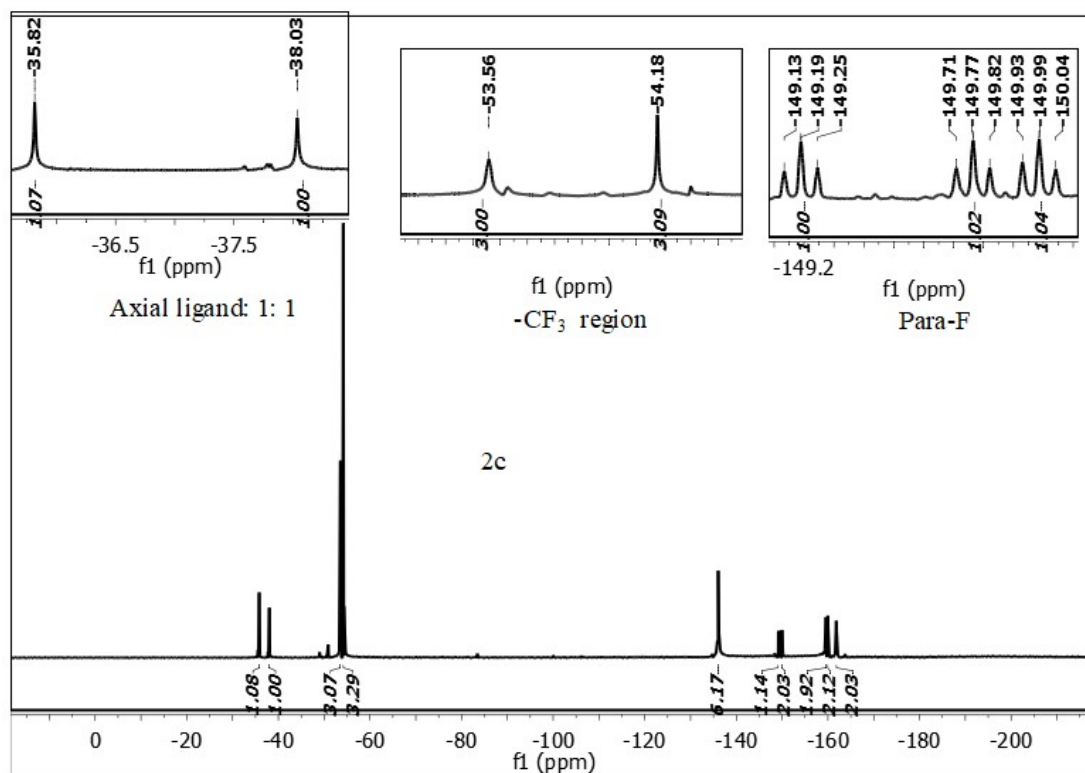

Fig S5. The  $^{19}\text{F-NMR}$  spectrum of **2c**.

## Generic Display Report

|               |                                |                      |              |
|---------------|--------------------------------|----------------------|--------------|
| Analysis Info | Acquisition Date               | 6/25/2017 4:38:50 PM |              |
| Analysis Name | D:\Data\Gross\Gr_5045n000001.d |                      |              |
| Method        | APCI_neg_SolidProbe.m          | Operator             | Larisa Panz  |
| Sample Name   | R805                           | Instrument           | maXis impact |
| Comment       |                                |                      |              |

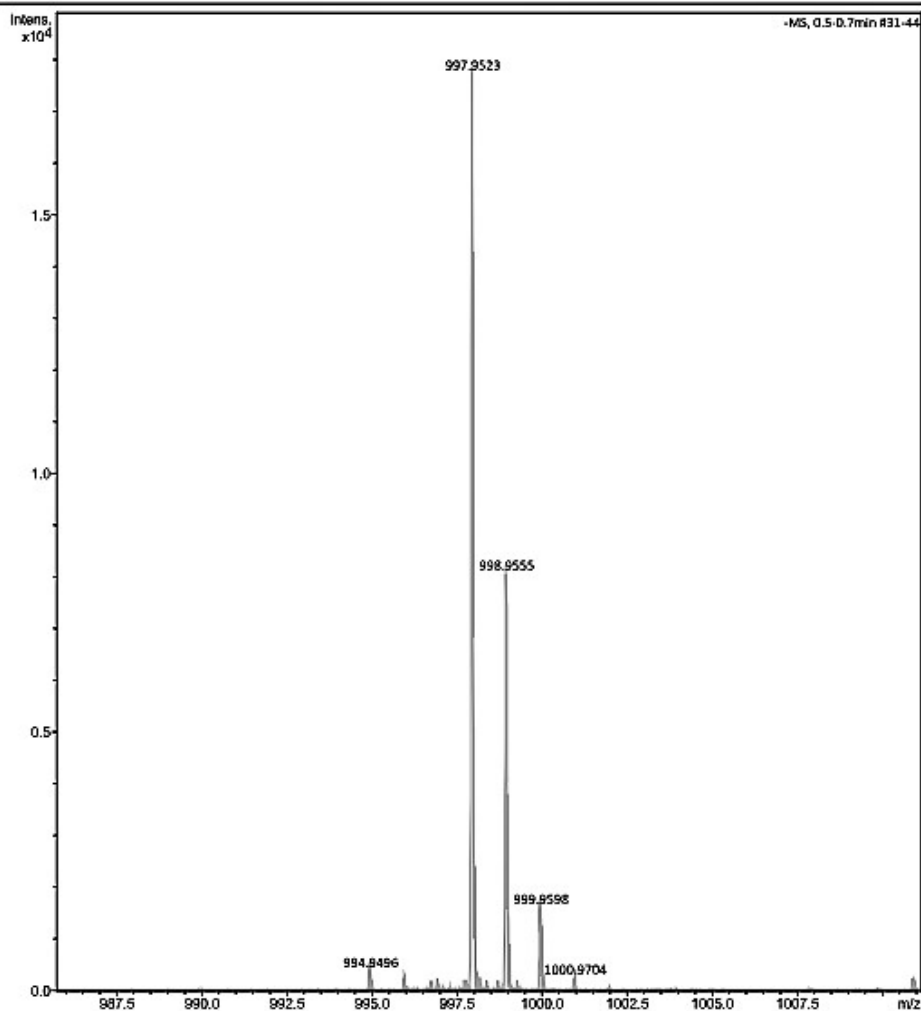

Bruker Compass DataAnalysis 4.2 printed: 6/25/2017 4:40:57 PM by: Larisa Panz Page 1 of 1

Fig S6. The APCI mass spectrum of 2c.

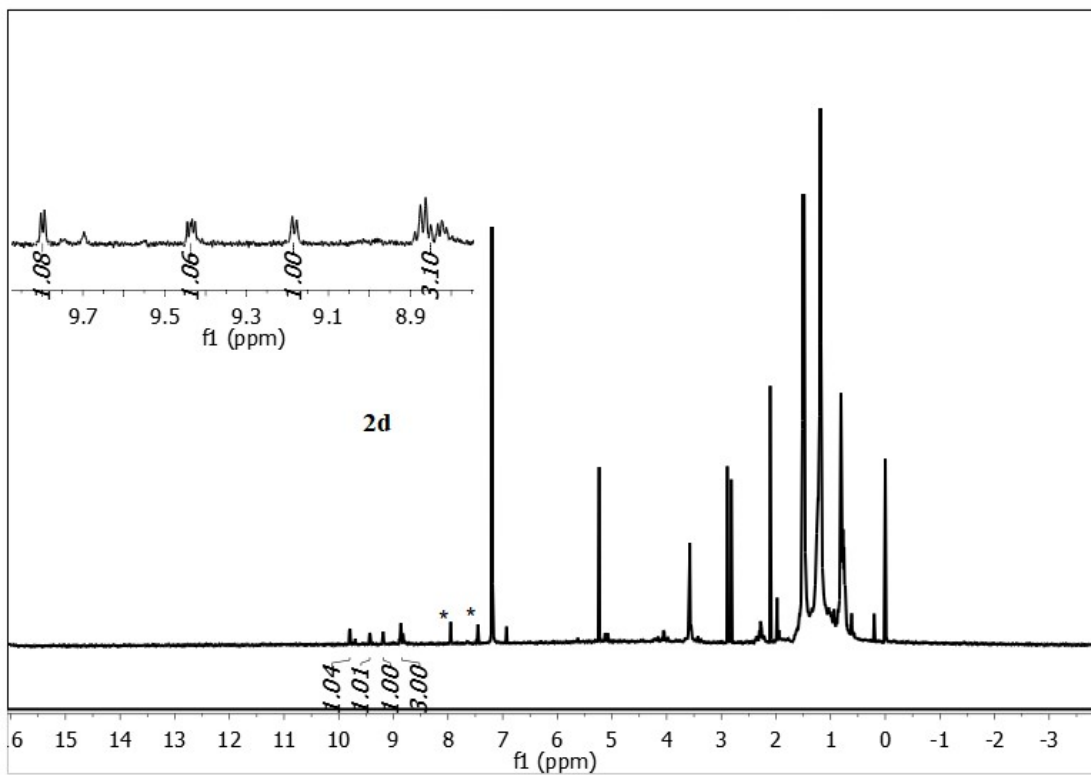

Fig S7. The  $^1\text{H-NMR}$  spectrum of **2d**.

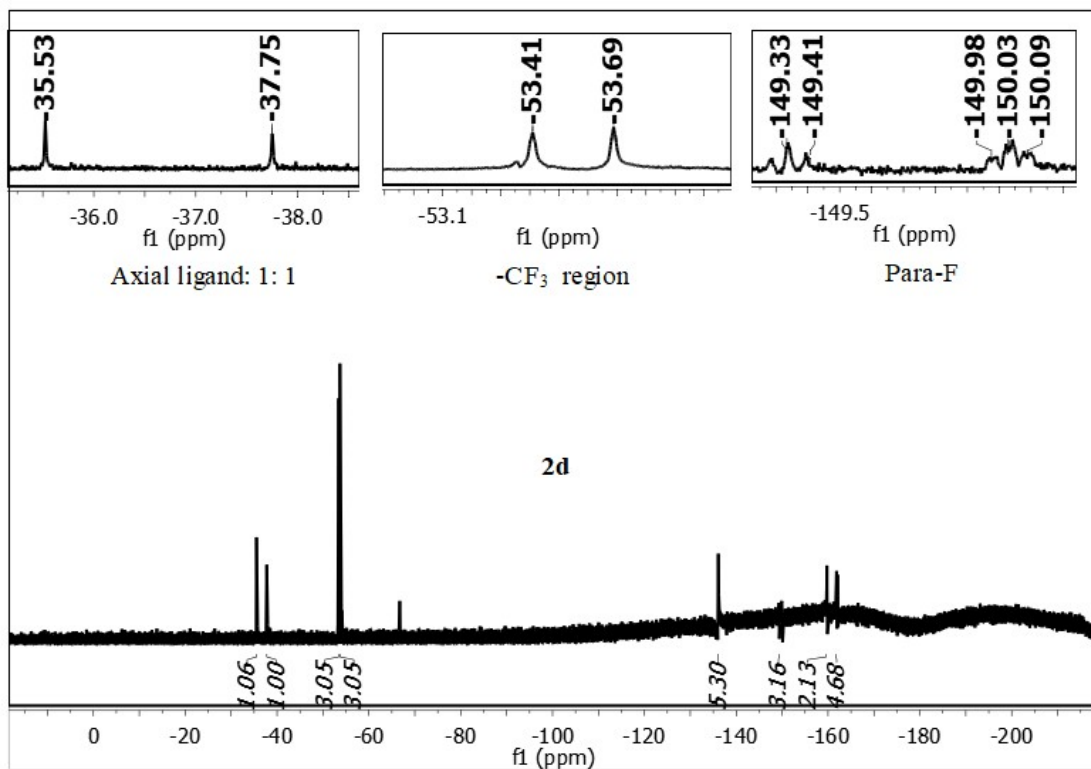

Fig S8. The  $^{19}\text{F-NMR}$  spectrum of **2d**.

## Generic Display Report

|               |                                |                      |              |
|---------------|--------------------------------|----------------------|--------------|
| Analysis Info | Acquisition Date               | 6/25/2017 4:23:59 PM |              |
| Analysis Name | D:\Data\Gross\Gr_5043n000001.d |                      |              |
| Method        | APCI_neg_SolidProbe.m          | Operator             | Larisa Panz  |
| Sample Name   | R802                           | Instrument           | maXis impact |
| Comment       |                                |                      |              |

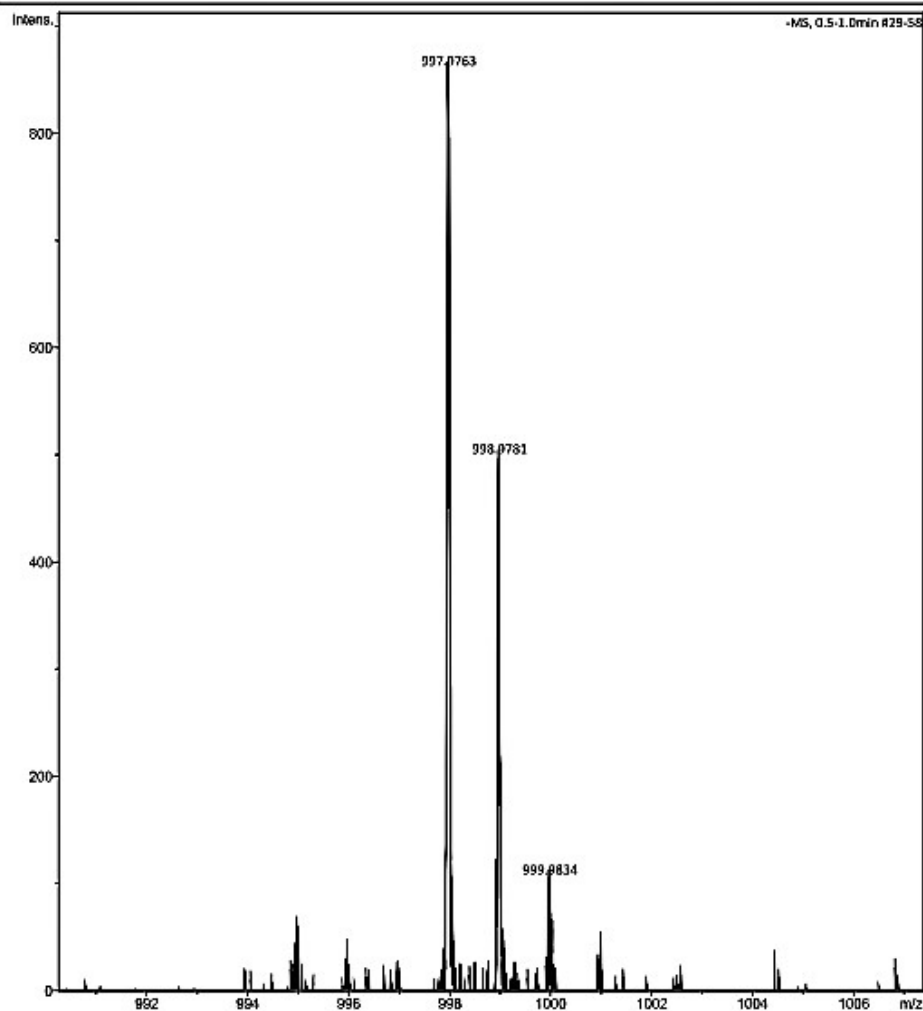

Bruker Compass DataAnalysis 4.2 printed: 6/25/2017 4:25:56 PM by: Larisa Panz Page 1 of 1

**Fig S9.** The APCI mass spectrum of **2d**.



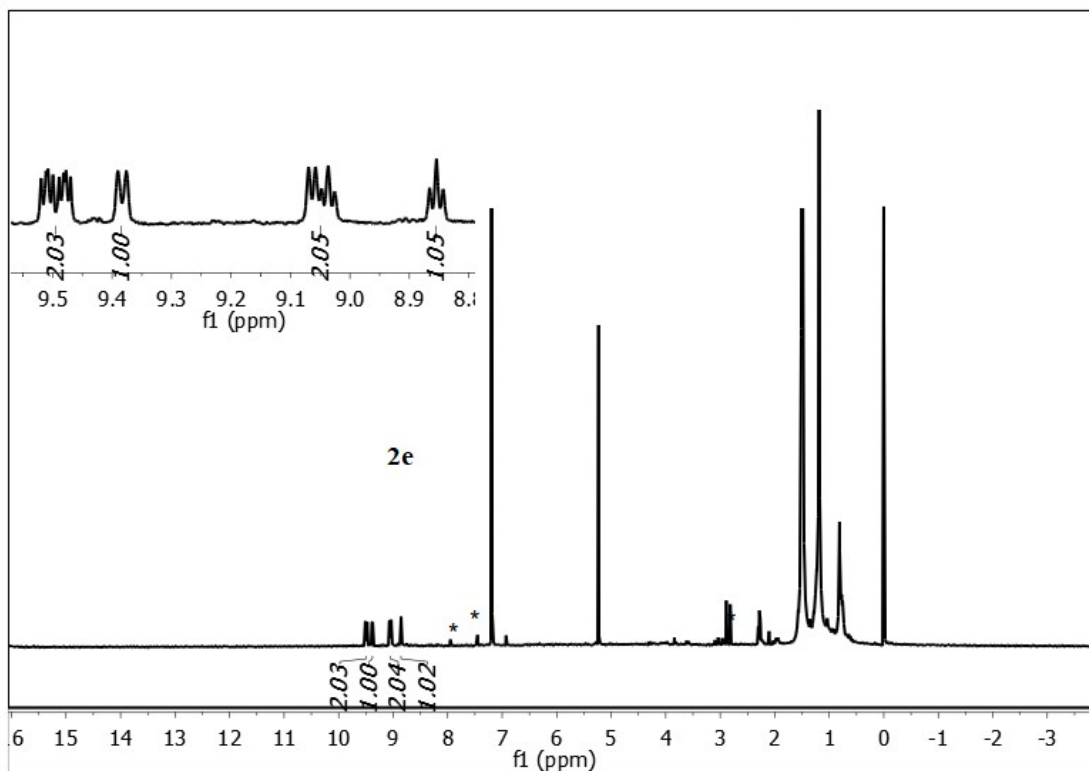

**Fig S10.** The  $^1\text{H-NMR}$  spectrum of **2e**.

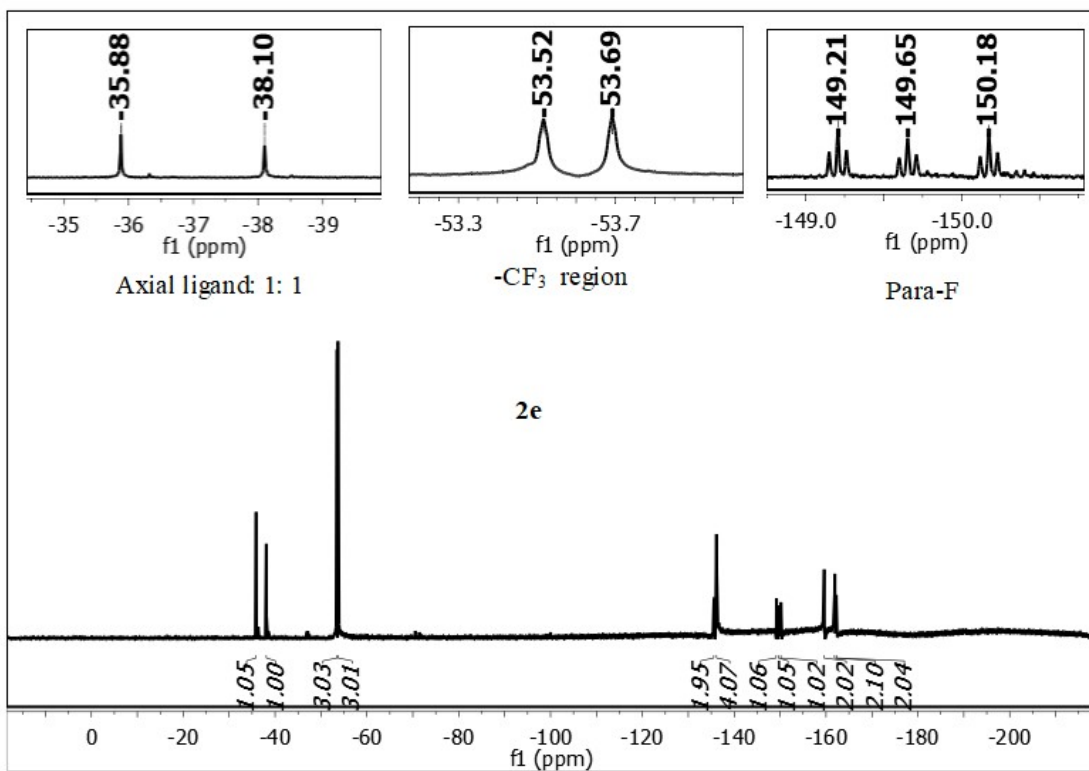

**Fig S11.** The  $^{19}\text{F-NMR}$  spectrum of **2e**.

## Generic Display Report

|               |                               |                       |              |
|---------------|-------------------------------|-----------------------|--------------|
| Analysis Info | Acquisition Date              | 12/11/2017 1:34:17 PM |              |
| Analysis Name | D:\Data\Gross\Gr_5857000001.d |                       |              |
| Method        | APCI_pos_SolidProbe.m         | Operator              | Larisa Panz  |
| Sample Name   | 2e                            | Instrument            | maXis impact |
| Comment       |                               |                       |              |

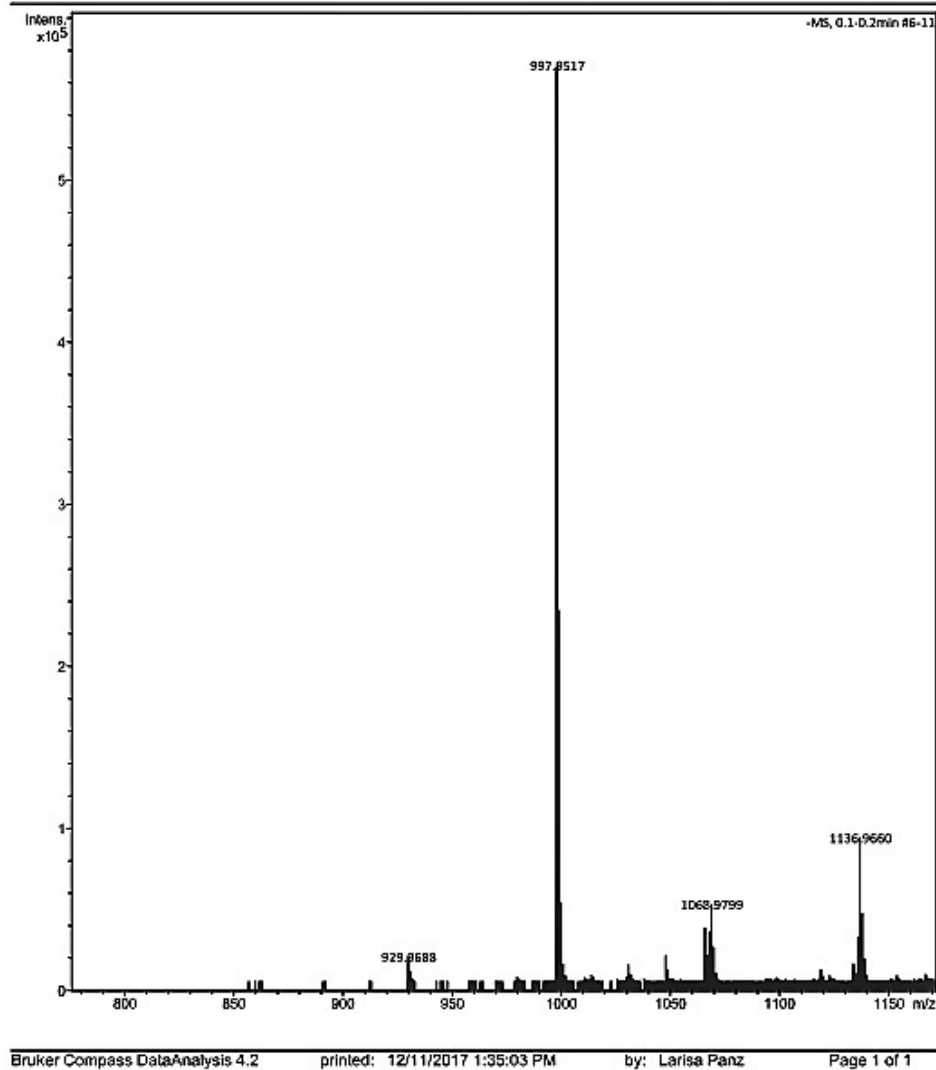

Fig S12. The APCI mass spectrum of 2e.

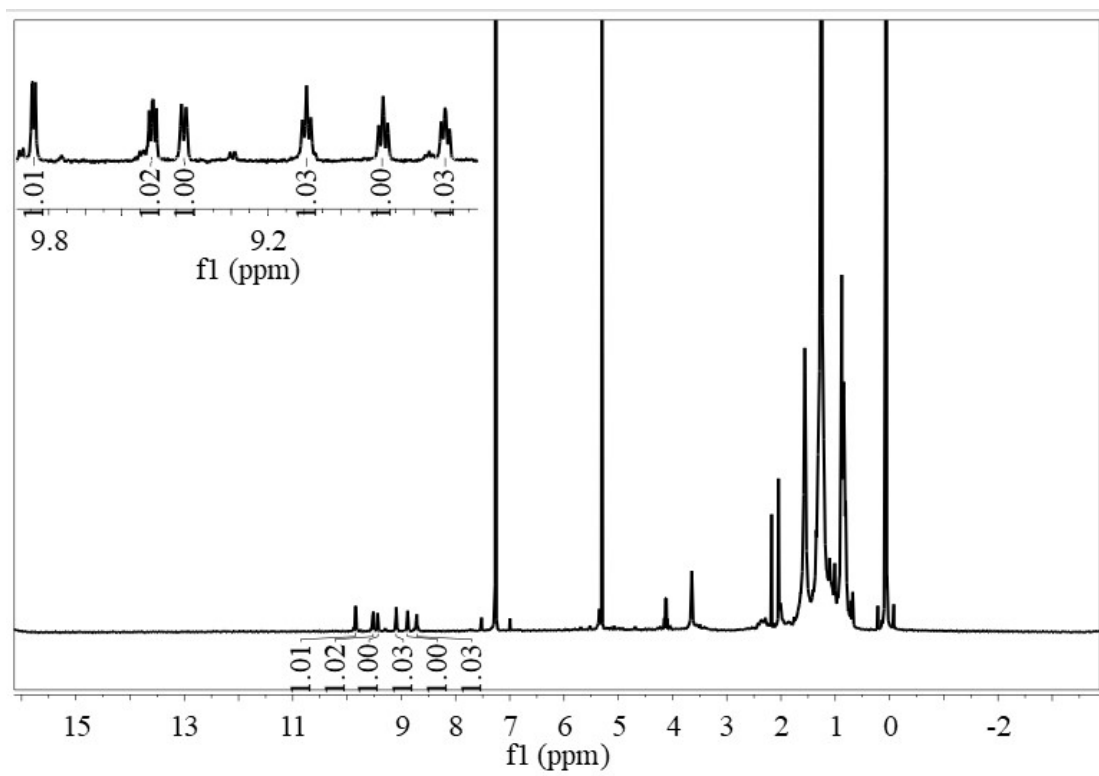

Fig S13. The  $^1\text{H-NMR}$  spectrum of **2f**.

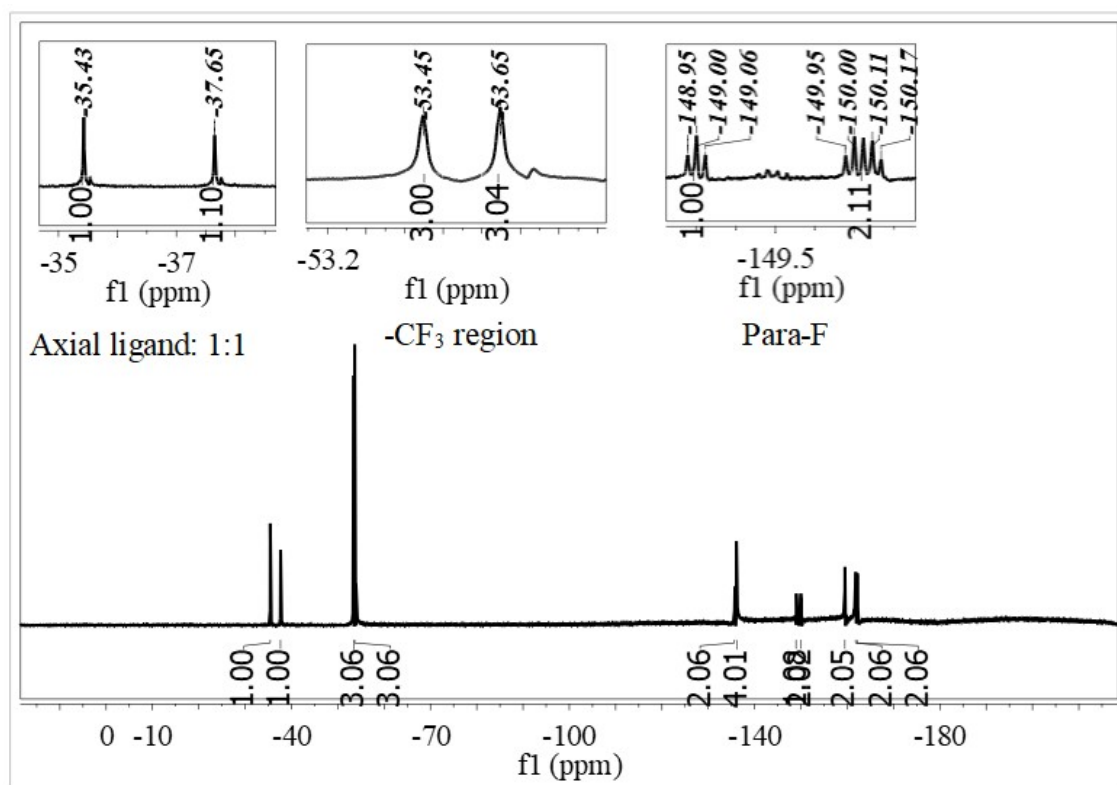

Fig S14. The  $^{19}\text{F-NMR}$  spectrum of **2f**.

## Generic Display Report

**Analysis Info**

Analysis Name D:\Data\Gross\Gr\_7609000001.d  
 Method APCI\_pos\_SolidProbe.m  
 Sample Name 2f  
 Comment

Acquisition Date 20/02/2019 18:59:25

Operator Larisa Panz  
 Instrument maXis impact

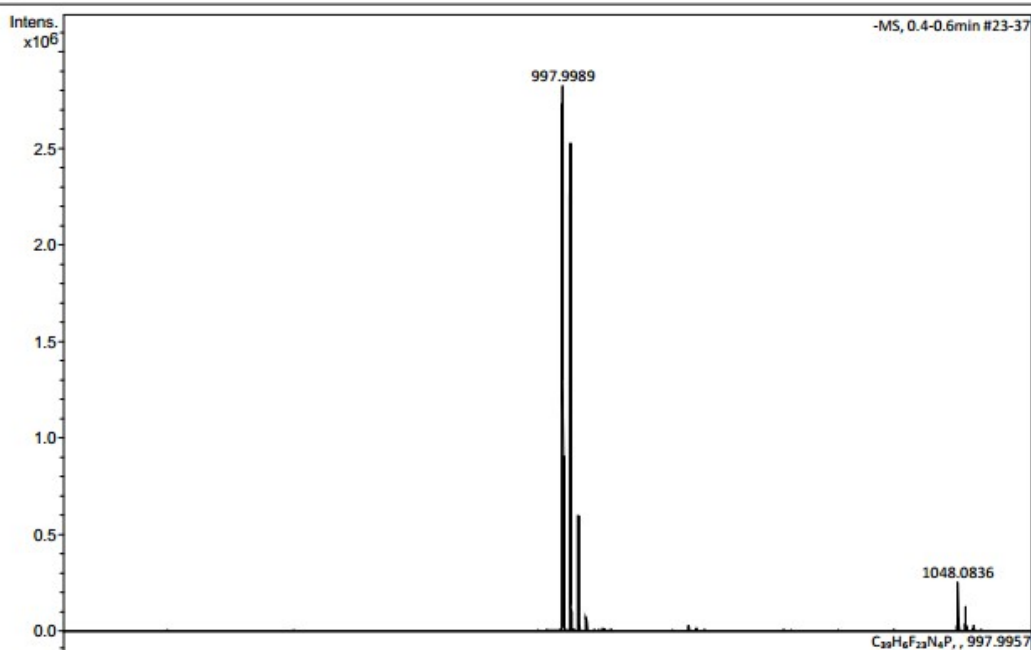

**Fig S15.** The APCI mass spectrum of **2f**.

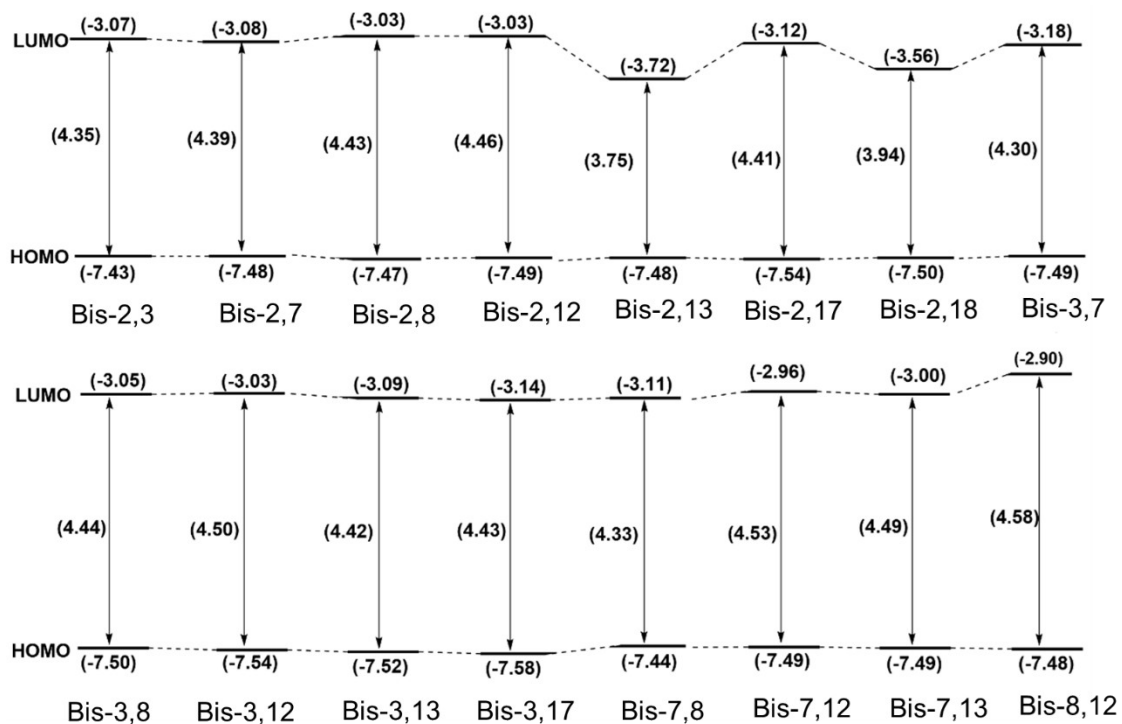

**Fig S16.** Calculated HOMO, LUMO and HOMO – LUMO band gap energies (eV).

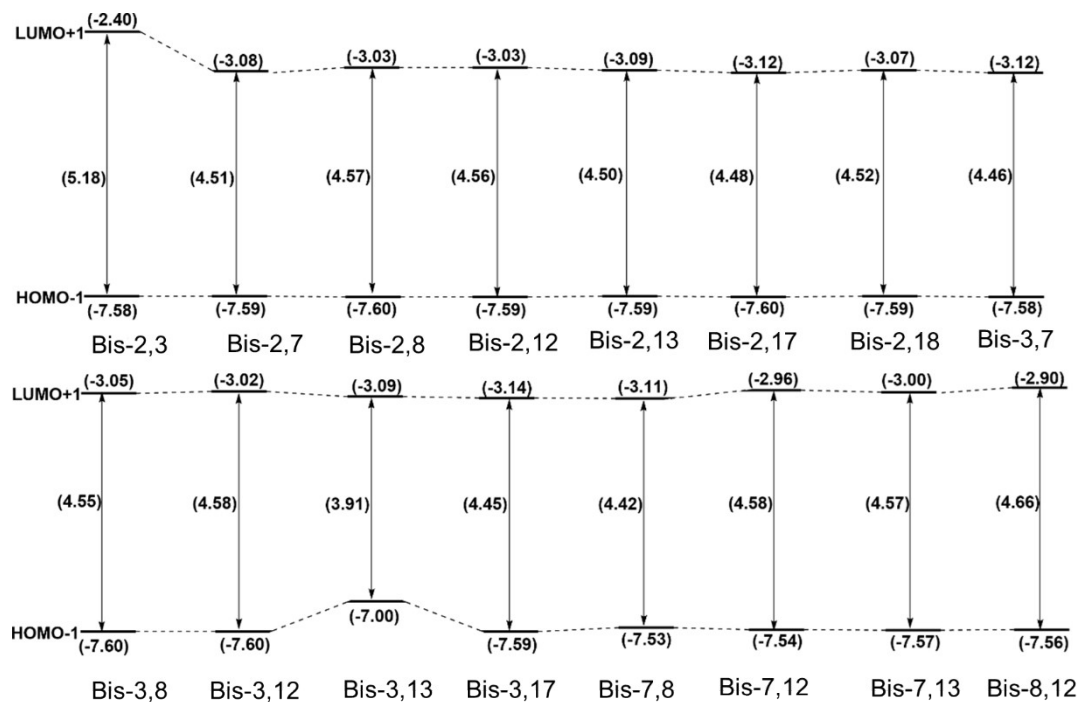

Fig S17. Calculated HOMO-1, LUMO+1 and their band gap energies (eV).

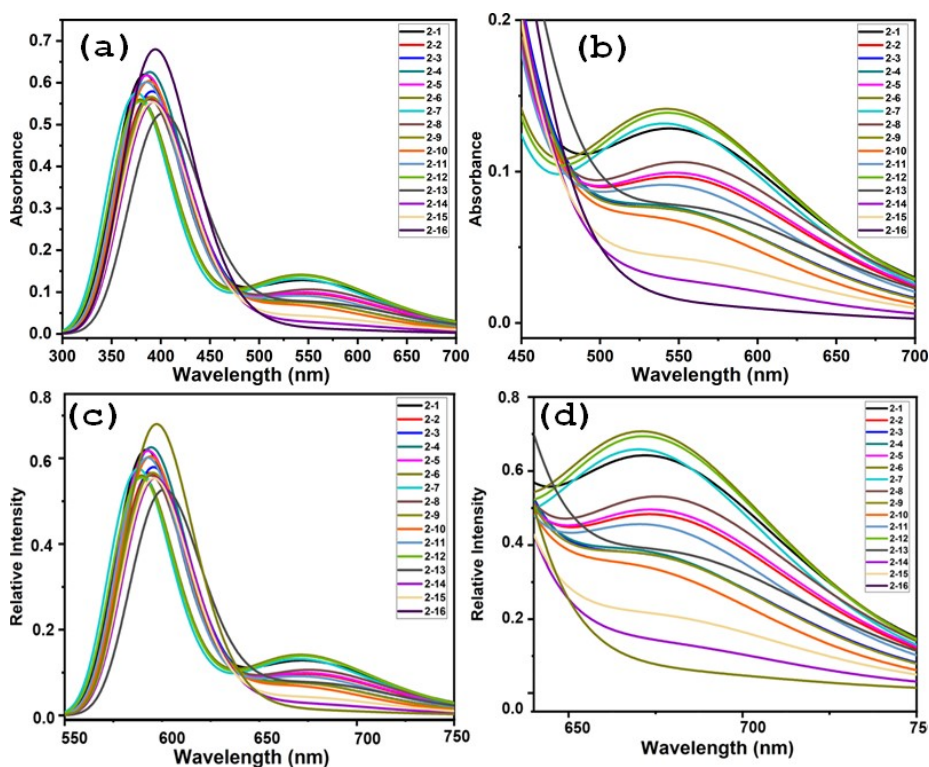

Fig S18. Calculated UV-vis and fluorescence emission spectra of all 16 bi-CF<sub>3</sub> isomers. Compounds 2-X here can be corresponded into the compounds Bis-XX in Fig S20.

**Assignment work flow  
(6 out 16 possibilities)**

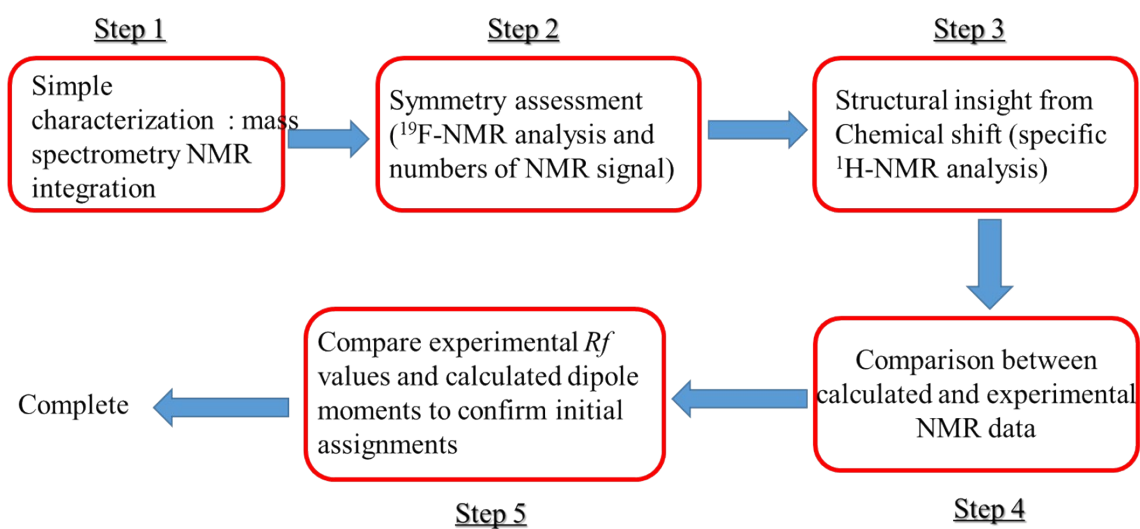

**Fig S19.** Assignment work flow of 6 bis- $\text{CF}_3$  isomers from 16 possible species.

| substitution | name | 2a (REF)                                             | 2b                                                                                                                                                                                | 2c                                                                                                                                                                                                                 | 2d                                                                                                                                                                                                                                                                                                                                                               | 2e                                                                                                                                                                          | 2f                                                                                                                                                                                                                                                                                                                                                                  |
|--------------|------|------------------------------------------------------|-----------------------------------------------------------------------------------------------------------------------------------------------------------------------------------|--------------------------------------------------------------------------------------------------------------------------------------------------------------------------------------------------------------------|------------------------------------------------------------------------------------------------------------------------------------------------------------------------------------------------------------------------------------------------------------------------------------------------------------------------------------------------------------------|-----------------------------------------------------------------------------------------------------------------------------------------------------------------------------|---------------------------------------------------------------------------------------------------------------------------------------------------------------------------------------------------------------------------------------------------------------------------------------------------------------------------------------------------------------------|
| 2,3          | 2-1  | N/A                                                  | Assigned from NMR data – no doublets in <sup>1</sup> H NMRs; one C <sub>2</sub> H atom is available; Starting material was 1b bearing a CF <sub>3</sub> group at C <sub>2</sub> H | N/A: symmetrical condition is not compliant; one CF <sub>3</sub> should occupy at C <sub>2</sub> H or C <sub>12</sub> H but it did not                                                                             | N/A: already assigned to compound 2b; symmetrical condition is not compliant                                                                                                                                                                                                                                                                                     | N/A: already assigned to compound 2b; presence of at least one doublet in <sup>1</sup> H NMR                                                                                | N/A: no doublets are predicted in <sup>1</sup> H-NMRs; symmetrical condition is not compliant                                                                                                                                                                                                                                                                       |
| 2,7          | 2-2  | N/A                                                  | N/A: doublets are predicted in <sup>1</sup> H NMRs; symmetrical condition is not compliant; no CF <sub>3</sub> group at C <sub>2</sub> H                                          | N/A: symmetrical condition is not compliant; one CF <sub>3</sub> should occupy at C <sub>2</sub> H or C <sub>12</sub> H but it did not                                                                             | N/A: symmetrical condition is not compliant; no CF <sub>3</sub> group at C <sub>2</sub> H                                                                                                                                                                                                                                                                        | N/A: No signal of C <sub>12</sub> H in the <sup>1</sup> H-NMR                                                                                                               | N/A: no CF <sub>3</sub> group at C <sub>2</sub> H; no CF <sub>3</sub> group at C <sub>2</sub> H or C <sub>12</sub> H                                                                                                                                                                                                                                                |
| 2,8          | 2-3  | N/A                                                  | N/A: doublets are predicted in <sup>1</sup> H NMRs; symmetrical condition is not compliant; no CF <sub>3</sub> group at C <sub>2</sub> H                                          | N/A: symmetrical condition is not compliant; one CF <sub>3</sub> should occupy at C <sub>2</sub> H or C <sub>12</sub> H but it did not                                                                             | N/A: symmetrical condition is not compliant; no CF <sub>3</sub> group at C <sub>2</sub> H; C <sub>2</sub> H is occupied                                                                                                                                                                                                                                          | N/A: No signal of C <sub>12</sub> H in the <sup>1</sup> H-NMR                                                                                                               | N/A: no CF <sub>3</sub> group at C <sub>2</sub> H                                                                                                                                                                                                                                                                                                                   |
| 2,12         | 2-4  | N/A                                                  | N/A: doublets are predicted in <sup>1</sup> H NMRs; symmetrical condition is not compliant; no CF <sub>3</sub> group at C <sub>2</sub> H                                          | N/A: symmetrical condition is not compliant; one CF <sub>3</sub> should occupy at C <sub>2</sub> H or C <sub>12</sub> H but it did not                                                                             | N/A: no CF <sub>3</sub> group at C <sub>2</sub> H; C <sub>12</sub> H is occupied                                                                                                                                                                                                                                                                                 | N/A: No signal of C <sub>12</sub> H in the <sup>1</sup> H-NMR                                                                                                               | N/A: no CF <sub>3</sub> group at C <sub>2</sub> H                                                                                                                                                                                                                                                                                                                   |
| 2,13         | 2-5  | N/A                                                  | N/A: doublets are predicted in <sup>1</sup> H NMRs; symmetrical condition is not compliant; no CF <sub>3</sub> group at C <sub>2</sub> H                                          | N/A: symmetrical condition is not compliant; one CF <sub>3</sub> should occupy at C <sub>2</sub> H or C <sub>12</sub> H but it did not                                                                             | N/A: symmetrical condition is not compliant; no CF <sub>3</sub> group at C <sub>2</sub> H                                                                                                                                                                                                                                                                        | N/A: No signal of C <sub>12</sub> H in the <sup>1</sup> H-NMR                                                                                                               | N/A: no CF <sub>3</sub> group at C <sub>2</sub> H; no CF <sub>3</sub> group at C <sub>2</sub> H or C <sub>12</sub> H                                                                                                                                                                                                                                                |
| 2,17         | 2-6  | N/A                                                  | N/A: doublets are predicted in <sup>1</sup> H NMRs; symmetrical condition is not compliant; no CF <sub>3</sub> group at C <sub>2</sub> H                                          | Assigned from NMR data: matched symmetrical condition; broad C <sub>2</sub> H doublet signal and also one CF <sub>3</sub> occupy at C <sub>12</sub> H                                                              | N/A: no CF <sub>3</sub> group at C <sub>2</sub> H                                                                                                                                                                                                                                                                                                                | N/A: No signal of C <sub>12</sub> H in the <sup>1</sup> H-NMR; symmetrical condition is not compliant                                                                       | N/A: no CF <sub>3</sub> group at C <sub>2</sub> H; no CF <sub>3</sub> group at C <sub>2</sub> H or C <sub>12</sub> H                                                                                                                                                                                                                                                |
| 2,18         | 2-7  | N/A                                                  | N/A: doublets are predicted in <sup>1</sup> H NMRs; symmetrical condition is not compliant; no CF <sub>3</sub> group at C <sub>2</sub> H                                          | N/A: symmetrical condition is not compliant                                                                                                                                                                        | N/A: symmetrical condition is not compliant; no CF <sub>3</sub> group at C <sub>2</sub> H; no available C <sub>2</sub> H or C <sub>12</sub> H                                                                                                                                                                                                                    | N/A: symmetrical condition is not compliant                                                                                                                                 | N/A: no CF <sub>3</sub> group at C <sub>2</sub> H; symmetrical condition is not compliant; no CF <sub>3</sub> group at C <sub>2</sub> H or C <sub>12</sub> H                                                                                                                                                                                                        |
| 3,7          | 2-8  | N/A                                                  | N/A: doublets are predicted in <sup>1</sup> H NMRs; symmetrical condition is not compliant                                                                                        | N/A: symmetrical condition is not compliant; one CF <sub>3</sub> should occupy at C <sub>2</sub> H or C <sub>12</sub> H but it did not                                                                             | N/A: symmetrical condition is not compliant                                                                                                                                                                                                                                                                                                                      | N/A: symmetrical condition is not compliant; has C <sub>2</sub> H and C <sub>12</sub> H                                                                                     | N/A: no CF <sub>3</sub> group at C <sub>2</sub> H or C <sub>12</sub> H                                                                                                                                                                                                                                                                                              |
| 3,8          | 2-9  | N/A                                                  | N/A: doublets are predicted in <sup>1</sup> H NMRs; symmetrical condition is not compliant                                                                                        | N/A: symmetrical condition is not compliant; one CF <sub>3</sub> should occupy at C <sub>2</sub> H or C <sub>12</sub> H but it did not                                                                             | N/A: symmetrical condition is not compliant; C <sub>2</sub> H is occupied                                                                                                                                                                                                                                                                                        | N/A: symmetrical condition is not compliant; has C <sub>2</sub> H and C <sub>12</sub> H                                                                                     | Assigned from NMR data: not C <sub>2v</sub> symmetry; should have C <sub>2</sub> H or C <sub>12</sub> H (showed chemical shift at 9.85 ppm); should have available C <sub>2</sub> H or C <sub>12</sub> H; the shape of <sup>1</sup> H-NMR looks like the superimposition of 1b and 1d. Starting material was 1b bearing a CF <sub>3</sub> group at C <sub>2</sub> H |
| 3,12         | 2-10 | N/A                                                  | N/A: doublets are predicted in <sup>1</sup> H NMRs; symmetrical condition is not compliant                                                                                        | N/A: symmetrical condition is not compliant; one CF <sub>3</sub> should occupy at C <sub>2</sub> H or C <sub>12</sub> H but it did not                                                                             | N/A: symmetrical condition is not compliant; C <sub>12</sub> H is occupied                                                                                                                                                                                                                                                                                       | N/A: symmetrical condition is not compliant; has C <sub>2</sub> H and C <sub>12</sub> H                                                                                     | N/A: symmetrical condition is not compliant                                                                                                                                                                                                                                                                                                                         |
| 3,13         | 2-11 | N/A                                                  | N/A: doublets are predicted in <sup>1</sup> H NMRs; symmetrical condition is not compliant                                                                                        | N/A: symmetrical condition is not compliant; one CF <sub>3</sub> should occupy at C <sub>2</sub> H or C <sub>12</sub> H but it did not                                                                             | Assigned from NMR data: should have available C <sub>2</sub> H or C <sub>12</sub> H (showed chemical shift at 9.80 ppm); should contain C <sub>2</sub> H and C <sub>12</sub> H (showed chemical shift from 8.89-8.84 ppm); Starting material was 1b bearing a CF <sub>3</sub> group at C <sub>2</sub> H; near C <sub>2v</sub> symmetry from <sup>19</sup> F-NMR. | N/A: symmetrical condition is not compliant; has C <sub>2</sub> H and C <sub>12</sub> H                                                                                     | N/A: already assigned to compound 2d; no CF <sub>3</sub> group at C <sub>2</sub> H or C <sub>12</sub> H; symmetrical condition is not compliant                                                                                                                                                                                                                     |
| 3,17         | 2-12 | Structurally characterized, symmetrical NMR spectrum | N/A: already structurally characterized as compound 2a                                                                                                                            | N/A: already structurally characterized as compound 2a                                                                                                                                                             | N/A: already structurally characterized as compound 2a                                                                                                                                                                                                                                                                                                           | N/A: already structurally characterized as compound 2a                                                                                                                      | N/A: already structurally characterized as compound 2a                                                                                                                                                                                                                                                                                                              |
| 7,8          | 2-13 | N/A                                                  | N/A: no CF <sub>3</sub> group at C <sub>2</sub> H                                                                                                                                 | N/A: presence of at least one doublet in <sup>1</sup> H NMR                                                                                                                                                        | N/A: symmetrical condition is not compliant; C <sub>2</sub> H is occupied; no CF <sub>3</sub> group at C <sub>2</sub> H                                                                                                                                                                                                                                          | N/A: symmetrical condition is not compliant; has C <sub>2</sub> H and C <sub>12</sub> H; presence of at least one doublet in <sup>1</sup> H NMR                             | N/A: no CF <sub>3</sub> group at C <sub>2</sub> H; symmetrical condition is not compliant                                                                                                                                                                                                                                                                           |
| 7,12         | 2-14 | N/A                                                  | N/A: doublets are predicted in <sup>1</sup> H NMRs; symmetrical condition is not compliant; no CF <sub>3</sub> group at C <sub>2</sub> H                                          | N/A: symmetrical condition is not compliant; one CF <sub>3</sub> should occupy at C <sub>2</sub> H or C <sub>12</sub> H and another CF <sub>3</sub> should at C <sub>2</sub> H or C <sub>12</sub> H but it did not | N/A: C <sub>12</sub> H is occupied; no CF <sub>3</sub> group at C <sub>2</sub> H                                                                                                                                                                                                                                                                                 | Assigned from NMR data showing NMR that has C <sub>2</sub> H or C <sub>12</sub> H signal and C <sub>12</sub> H or C <sub>12</sub> H signal and not C <sub>2v</sub> symmetry | N/A: no CF <sub>3</sub> group at C <sub>2</sub> H; symmetrical condition is not compliant                                                                                                                                                                                                                                                                           |
| 7,13         | 2-15 | N/A                                                  | N/A: doublets are predicted in <sup>1</sup> H NMRs; symmetrical condition is not compliant; no CF <sub>3</sub> group at C <sub>2</sub> H                                          | N/A: symmetrical condition is not compliant; one CF <sub>3</sub> should occupy at C <sub>2</sub> H or C <sub>12</sub> H and another CF <sub>3</sub> should at C <sub>2</sub> H or C <sub>12</sub> H but it did not | N/A: symmetrical condition is not compliant; no CF <sub>3</sub> group at C <sub>2</sub> H                                                                                                                                                                                                                                                                        | N/A: symmetrical condition is not compliant; has C <sub>2</sub> H and C <sub>12</sub> H                                                                                     | N/A: no CF <sub>3</sub> group at C <sub>2</sub> H; symmetrical condition is not compliant                                                                                                                                                                                                                                                                           |
| 8,12         | 2-16 | N/A                                                  | N/A: doublets are predicted in <sup>1</sup> H NMRs; symmetrical condition is not compliant; no CF <sub>3</sub> group at C <sub>2</sub> H                                          | N/A: symmetrical condition is not compliant; one CF <sub>3</sub> should occupy at C <sub>2</sub> H or C <sub>12</sub> H and another CF <sub>3</sub> should at C <sub>2</sub> H or C <sub>12</sub> H but it did not | N/A: symmetrical condition is not compliant; no CF <sub>3</sub> group at C <sub>2</sub> H; no available C <sub>2</sub> H and C <sub>12</sub> H                                                                                                                                                                                                                   | N/A: symmetrical condition is not compliant; has C <sub>2</sub> H and C <sub>12</sub> H                                                                                     | N/A: no CF <sub>3</sub> group at C <sub>2</sub> H; symmetrical condition is not compliant                                                                                                                                                                                                                                                                           |

Fig S20. NMR assignments of all 6 isomers in table form with individual reasons for assignments clarified.



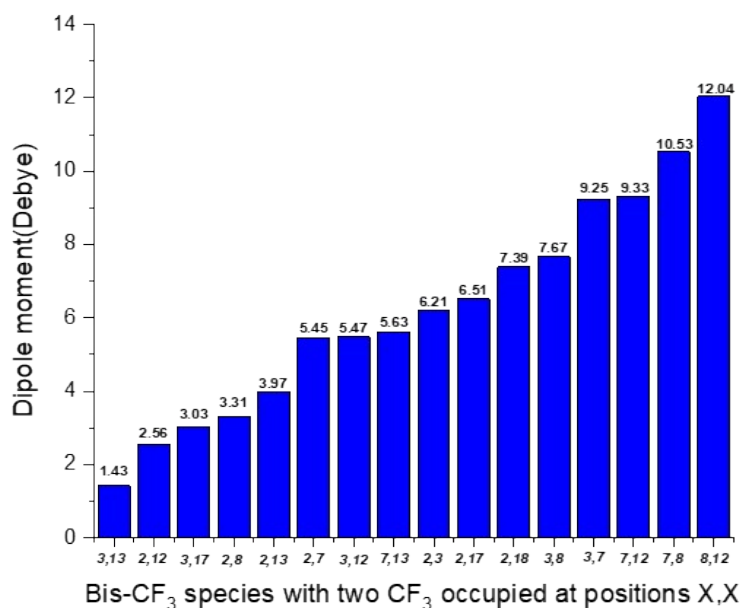

**Figure 21.** DFT calculated dipole moments of all 16 bis-isomers with incrementally increased dipole moment from left to right.

Cartesian Coordinates of Optimized Geometries:

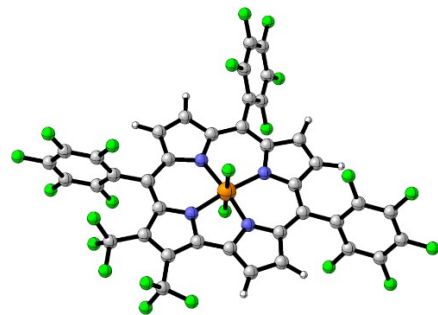

|   |          |          |          |
|---|----------|----------|----------|
| F | 4.53726  | 0.45266  | 2.40686  |
| F | 7.21952  | 1.05489  | -2.38151 |
| F | 7.21695  | 1.05248  | 2.40686  |
| F | -2.99262 | 6.73357  | 2.36948  |
| F | 8.56600  | 1.35314  | 0.01351  |
| F | -1.25282 | 7.25780  | -2.05948 |
| F | -2.44956 | 8.34073  | 0.18576  |
| N | 0.71924  | 1.13956  | 0.02007  |
| N | 1.20486  | -1.47235 | -0.00411 |
| N | -1.18171 | -2.04149 | -0.01101 |
| N | -1.97056 | 0.49003  | 0.00777  |
| P | -0.32521 | -0.40038 | 0.00352  |
| F | -0.32848 | -0.40200 | 1.74701  |
| F | -0.32366 | -0.37507 | -1.73980 |
| F | -5.30347 | -0.96520 | -2.24851 |
| F | -8.91877 | -3.30227 | -0.19627 |
| F | -7.89085 | -1.84823 | -2.31194 |
| F | -4.74275 | -2.96799 | 2.08285  |
| F | -7.32710 | -3.85839 | 1.99574  |
| F | 4.53983  | 0.45533  | -2.38501 |
| F | -2.34332 | 4.07467  | 2.31756  |
| F | -0.60945 | 4.59793  | -2.12944 |
| C | -0.38061 | -3.16439 | -0.02340 |
| C | 2.56181  | -1.21038 | -0.00330 |
| C | 0.23916  | 2.45166  | 0.05142  |
| C | -2.50940 | -2.42446 | -0.03704 |
| C | 0.98318  | -2.83741 | -0.01633 |
| C | -3.25294 | -0.10608 | -0.01508 |
| C | -3.53560 | -1.47508 | -0.04217 |
| C | -2.14354 | 1.87511  | 0.03681  |
| C | -1.21425 | -4.30958 | -0.05527 |
| C | -2.52744 | -3.85519 | -0.06588 |



|   |          |          |          |   |          |          |          |
|---|----------|----------|----------|---|----------|----------|----------|
| C | 2.13012  | 1.18977  | 0.02441  |   |          |          |          |
| C | -4.94891 | -1.93781 | -0.07904 |   |          |          |          |
| C | -7.10383 | -2.12306 | -1.22055 |   |          |          |          |
| C | -1.10717 | 2.81363  | 0.05971  |   |          |          |          |
| C | -1.45789 | 4.26172  | 0.09249  |   |          |          |          |
| C | -5.78537 | -1.67923 | -1.17340 |   |          |          |          |
| C | -3.54752 | 2.14953  | 0.03180  |   |          |          |          |
| C | 3.20885  | -2.49733 | -0.01429 |   |          |          |          |
| C | 3.02213  | 0.11642  | 0.00952  |   |          |          |          |
| C | -4.21479 | 0.95371  | 0.00462  | P | 0.41911  | -0.67267 | -0.01260 |
| C | 2.22859  | -3.48930 | -0.02253 | F | 0.41957  | -0.64531 | -1.75389 |
| C | 4.48001  | 0.43285  | 0.01079  | F | 0.40182  | -0.63520 | 1.72877  |
| C | -6.81901 | -3.13781 | 0.94289  | F | 5.39339  | -0.26324 | 2.26972  |
| C | -7.62257 | -2.85743 | -0.15819 | F | 9.40674  | -1.88339 | 0.26616  |
| C | -5.50525 | -2.67845 | 0.97266  | F | 8.10138  | -0.63795 | 2.36167  |
| C | 1.36707  | 3.33551  | 0.07918  | F | 5.26442  | -2.36470 | -2.04834 |
| C | 2.50366  | 2.57588  | 0.05912  | F | 7.97102  | -2.74601 | -1.93394 |
| C | -2.06265 | 4.84740  | 1.21226  | F | -4.46818 | -0.83908 | 2.43399  |
| C | 5.19117  | 0.59679  | -1.18171 | F | 1.54596  | 4.08566  | -2.34505 |
| C | 5.19012  | 0.59505  | 1.20414  | F | -0.24190 | 4.29051  | 2.10505  |
| C | -1.20123 | 5.10714  | -0.99472 | F | -4.56310 | -1.15079 | -2.34510 |
| C | 6.54746  | 0.89888  | 1.21700  | F | -7.18055 | -1.26347 | 2.51483  |
| C | 6.54870  | 0.90028  | -1.19267 | F | -7.27585 | -1.57467 | -2.26250 |
| C | 7.22820  | 1.05056  | 0.01256  | F | 1.68789  | 6.81969  | -2.40689 |
| C | -2.39952 | 6.19756  | 1.25261  | F | -8.59182 | -1.62983 | 0.16699  |
| C | -1.52181 | 6.46180  | -0.97310 | F | -0.10172 | 7.02525  | 2.02818  |
| C | -2.12570 | 7.00874  | 0.15527  | F | 0.86400  | 8.30412  | -0.22485 |
| H | -0.88065 | -5.33510 | -0.07069 | N | -0.93587 | 0.64532  | -0.02817 |
| H | 1.30418  | 4.41045  | 0.11519  | N | -0.85680 | -2.00822 | -0.01390 |
| H | -3.98171 | 3.13542  | 0.04398  | N | 1.57577  | -2.11817 | -0.00051 |
| H | -5.28265 | 0.80907  | 0.00318  | N | 1.86479  | 0.51339  | -0.00978 |
| H | -3.41750 | -4.46333 | -0.09246 | C | 1.00220  | -3.37697 | 0.01080  |
| H | 3.52160  | 2.92915  | 0.07084  | C | -2.23490 | -1.99241 | 0.00402  |
| C | 4.65184  | -2.81191 | -0.01708 | C | -0.68059 | 2.01518  | -0.07140 |
| F | 5.32969  | -2.30362 | -1.13093 | C | 2.94941  | -2.24429 | 0.04076  |
| F | 4.86249  | -4.18550 | -0.02295 | C | -0.39663 | -3.30816 | -0.00781 |
| F | 5.33184  | -2.31240 | 1.09937  | C | 3.23603  | 0.17161  | 0.02272  |
| C | 2.47344  | -5.00966 | -0.03480 | C | 3.77683  | -1.11705 | 0.05489  |
| F | 1.28839  | -5.65625 | -0.04286 | C | 1.77129  | 1.90569  | -0.04511 |
| F | 3.17572  | -5.34347 | -1.13838 | C | 2.03815  | -4.34335 | 0.05837  |
| F | 3.17086  | -5.36204 | 1.06608  | C | 3.23880  | -3.64685 | 0.07658  |
|   |          |          |          | C | -2.34434 | 0.44387  | -0.02711 |
|   |          |          |          | C | 5.25192  | -1.30100 | 0.10648  |
|   |          |          |          | C | 7.39156  | -1.06509 | 1.26677  |

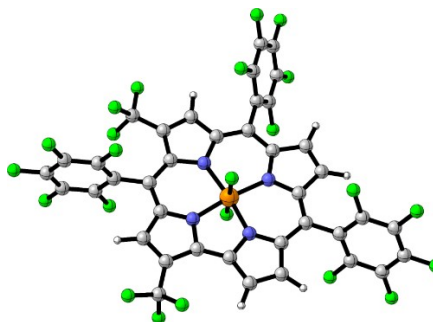

|   |          |          |          |   |          |          |          |
|---|----------|----------|----------|---|----------|----------|----------|
| C | 0.57801  | 2.62508  | -0.07835 |   |          |          |          |
| C | 0.64731  | 4.11399  | -0.11815 |   |          |          |          |
| C | 6.01332  | -0.88065 | 1.20544  |   |          |          |          |
| C | 3.09868  | 2.44294  | -0.03361 |   |          |          |          |
| C | -2.66344 | -3.35372 | 0.01635  |   |          |          |          |
| C | -2.97670 | -0.80451 | 0.00320  |   |          |          |          |
| C | 3.97946  | 1.39655  | 0.00378  |   |          |          |          |
| C | -1.53028 | -4.16025 | 0.01503  |   |          |          |          |
| C | -4.45944 | -0.96853 | 0.04172  |   |          |          |          |
| C | 7.32535  | -2.12938 | -0.89111 | P | -0.24265 | -0.85440 | -0.00175 |
| C | 8.05035  | -1.69415 | 0.21434  | F | -0.20787 | -0.83014 | 1.73939  |
| C | 5.94856  | -1.92881 | -0.93504 | F | -0.23871 | -0.83992 | -1.74380 |
| C | -1.92744 | 2.69529  | -0.10778 | F | -5.26494 | -0.38399 | -2.16501 |
| C | -2.93394 | 1.76400  | -0.07827 | F | -9.24474 | -1.93876 | -0.04608 |
| C | 1.12876  | 4.79754  | -1.24212 | F | -7.98004 | -0.71769 | -2.18030 |
| C | -5.15343 | -1.01471 | 1.25451  | F | -5.04704 | -2.47834 | 2.15282  |
| C | -5.20080 | -1.17035 | -1.12632 | F | -7.76131 | -2.81873 | 2.11511  |
| C | 0.24152  | 4.89983  | 0.96832  | F | 4.63477  | -2.18260 | -2.19562 |
| C | -6.57438 | -1.38657 | -1.09687 | F | -0.39149 | 3.96170  | 2.43454  |
| C | -6.52660 | -1.22947 | 1.30776  | F | -0.66627 | 4.04004  | -2.34743 |
| C | -7.23845 | -1.41510 | 0.12622  | F | 4.77379  | -0.06410 | 2.11293  |
| C | 1.20813  | 6.18665  | -1.28703 | F | 7.36576  | -2.35597 | -2.18909 |
| C | 0.30505  | 6.29027  | 0.94267  | F | 7.50495  | -0.23448 | 2.09916  |
| C | 0.79253  | 6.93602  | -0.19006 | F | -0.78682 | 6.67817  | 2.50083  |
| H | 1.89647  | -5.41104 | 0.08598  | F | 8.81693  | -1.38179 | -0.04689 |
| H | -2.05595 | 3.76212  | -0.15824 | F | -1.05929 | 6.75690  | -2.27923 |
| H | 3.33724  | 3.49337  | -0.04846 | F | -1.11923 | 8.08376  | 0.14436  |
| H | 5.05529  | 1.45636  | 0.01202  | N | 1.11210  | 0.46109  | -0.01805 |
| H | 4.22792  | -4.07411 | 0.11679  | N | 1.02628  | -2.21679 | -0.00881 |
| C | -1.51357 | -5.63249 | -0.05756 | N | -1.41312 | -2.28917 | 0.01164  |
| F | -0.45299 | -6.17645 | 0.67535  | N | -1.66206 | 0.34122  | 0.00825  |
| F | -2.68957 | -6.18419 | 0.43083  | C | -0.85766 | -3.55534 | 0.00221  |
| F | -1.35790 | -6.11060 | -1.35949 | C | 2.40711  | -2.23333 | -0.01733 |
| H | -3.68612 | -3.69300 | 0.03231  | C | 0.91727  | 1.85217  | -0.02818 |
| C | -4.35682 | 2.17957  | -0.11683 | C | -2.78901 | -2.39711 | 0.00052  |
| F | -4.45995 | 3.56365  | -0.19972 | C | 0.54243  | -3.50693 | 0.00637  |
| F | -5.08064 | 1.80366  | 1.01647  | C | -3.03999 | 0.02179  | 0.02058  |
| F | -5.05485 | 1.67109  | -1.21446 | C | -3.60050 | -1.25757 | 0.00581  |
|   |          |          |          | C | -1.53952 | 1.72995  | 0.03050  |
|   |          |          |          | C | -1.90658 | -4.50783 | -0.01809 |
|   |          |          |          | C | -3.09828 | -3.79490 | -0.01950 |
|   |          |          |          | C | 2.49964  | 0.19805  | -0.04643 |
|   |          |          |          | C | -5.07900 | -1.41938 | -0.00418 |
|   |          |          |          | C | -7.24630 | -1.15313 | -1.10473 |

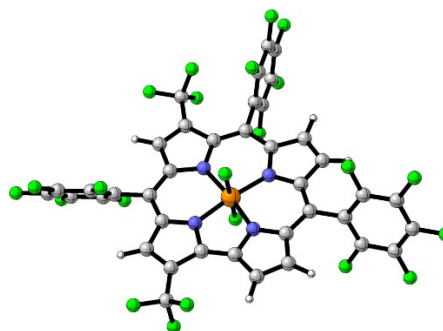

|   |          |          |          |   |          |          |          |
|---|----------|----------|----------|---|----------|----------|----------|
| C | -0.34497 | 2.45691  | 0.01036  |   |          |          |          |
| C | -0.50178 | 3.94277  | 0.04103  |   |          |          |          |
| C | -5.86422 | -0.98937 | -1.08245 |   |          |          |          |
| C | -2.85997 | 2.28834  | 0.06794  |   |          |          |          |
| C | 2.80892  | -3.60091 | 0.00024  |   |          |          |          |
| C | 3.14200  | -1.04528 | -0.03665 |   |          |          |          |
| C | -3.76040 | 1.25858  | 0.06221  |   |          |          |          |
| C | 1.65890  | -4.38281 | 0.00513  |   |          |          |          |
| C | 4.62775  | -1.11412 | -0.04335 |   |          |          |          |
| C | -7.13583 | -2.21405 | 1.05310  |   |          |          |          |
| C | -7.88476 | -1.76997 | -0.03271 | P | -0.22479 | -0.81680 | -0.00186 |
| C | -5.75549 | -2.03448 | 1.05796  | F | -0.22717 | -0.79051 | -1.74336 |
| C | 2.23042  | 2.45586  | -0.08070 | F | -0.19731 | -0.81132 | 1.73997  |
| C | 3.16504  | 1.45147  | -0.09273 | F | 4.77722  | -1.28820 | 2.18456  |
| C | -0.54892 | 4.64320  | 1.24998  | F | 8.42501  | -3.53160 | 0.08432  |
| C | 5.32852  | -1.69123 | -1.11137 | F | 7.38549  | -2.11724 | 2.22033  |
| C | 5.39777  | -0.63480 | 1.02546  | F | 4.22109  | -3.27382 | -2.15334 |
| C | -0.68540 | 4.68212  | -1.13113 | F | 6.82689  | -4.10631 | -2.09733 |
| C | 6.78725  | -0.71482 | 1.03266  | F | -5.25286 | -1.24325 | 2.20071  |
| C | 6.71706  | -1.78686 | -1.12192 | F | 0.58952  | 3.98489  | -2.39513 |
| C | 7.44969  | -1.29498 | -0.04548 | F | 0.75104  | 3.94321  | 2.39254  |
| C | -0.74969 | 6.01872  | 1.29644  | F | -5.02495 | 0.88599  | -2.09942 |
| C | -0.88712 | 6.05816  | -1.10919 | F | -7.96923 | -0.91343 | 2.21034  |
| C | -0.91808 | 6.72778  | 0.11069  | F | -7.73925 | 1.22141  | -2.06764 |
| H | -1.78009 | -5.57757 | -0.03916 | F | 0.87122  | 6.71621  | -2.37981 |
| H | -3.07921 | 3.34224  | 0.09572  | F | -9.22865 | 0.32238  | 0.08113  |
| H | -4.83462 | 1.33796  | 0.09101  | F | 1.03118  | 6.67476  | 2.40581  |
| H | -4.09374 | -4.20877 | -0.03668 | F | 1.09471  | 8.06865  | 0.02002  |
| C | 1.61067  | -5.85262 | 0.10583  | N | -1.31581 | 0.68705  | 0.01589  |
| F | 0.55380  | -6.39092 | -0.63584 | N | -1.71719 | -1.92780 | 0.00385  |
| F | 2.78474  | -6.43739 | -0.34748 | N | 0.66889  | -2.44076 | -0.01853 |
| F | 1.42045  | -6.30070 | 1.41449  | N | 1.40474  | 0.13203  | -0.01119 |
| H | 3.82371  | -3.96362 | -0.00024 | C | -0.10733 | -3.58318 | -0.01268 |
| H | 4.23139  | 1.58640  | -0.13944 | C | -3.07771 | -1.69233 | 0.01672  |
| C | 2.64265  | 3.87806  | -0.13592 | C | -0.85835 | 2.00461  | 0.02317  |
| F | 2.26434  | 4.61842  | 0.98635  | C | 2.00239  | -2.79799 | -0.00470 |
| F | 2.13765  | 4.56297  | -1.24384 | C | -1.47676 | -3.28532 | -0.01542 |
| F | 4.02747  | 3.98161  | -0.21649 | C | 2.68600  | -0.46140 | -0.02121 |
|   |          |          |          | C | 3.00232  | -1.82743 | -0.00494 |
|   |          |          |          | C | 1.55490  | 1.52775  | -0.03216 |
|   |          |          |          | C | 0.75119  | -4.71263 | 0.00663  |
|   |          |          |          | C | 2.05165  | -4.23049 | 0.01213  |
|   |          |          |          | C | -2.73091 | 0.71343  | 0.04436  |
|   |          |          |          | C | 4.42738  | -2.25467 | 0.01307  |

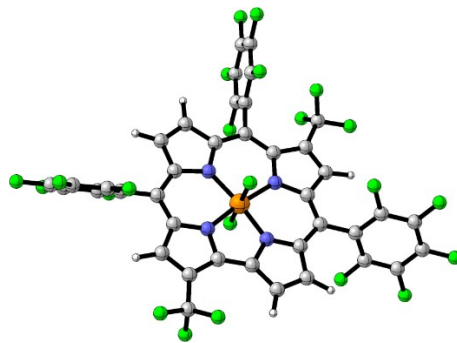

|   |          |          |          |   |          |          |          |
|---|----------|----------|----------|---|----------|----------|----------|
| C | 6.59546  | -2.40000 | 1.13433  |   |          |          |          |
| C | 0.47429  | 2.42108  | -0.00698 |   |          |          |          |
| C | 0.68267  | 3.90095  | -0.00234 |   |          |          |          |
| C | 5.26748  | -1.98461 | 1.10195  |   |          |          |          |
| C | 2.97399  | 1.79309  | -0.07034 |   |          |          |          |
| C | -3.72124 | -2.96209 | -0.00196 |   |          |          |          |
| C | -3.58773 | -0.38600 | 0.03878  |   |          |          |          |
| C | 3.63648  | 0.58928  | -0.06331 |   |          |          |          |
| C | -2.73216 | -3.94236 | -0.01231 |   |          |          |          |
| C | -5.06096 | -0.18464 | 0.05219  | P | 0.31077  | -0.61495 | -0.01452 |
| C | 6.31306  | -3.40491 | -1.03515 | F | 0.29942  | -0.58185 | 1.72698  |
| C | 7.11998  | -3.11480 | 0.06119  | F | 0.31530  | -0.58515 | -1.75573 |
| C | 4.98916  | -2.97518 | -1.04955 | F | -4.48729 | -1.98459 | -2.35211 |
| C | -2.00443 | 2.86897  | 0.06694  | F | -8.36625 | -3.19985 | 0.14746  |
| C | -3.12731 | 2.09124  | 0.08278  | F | -7.07604 | -2.89944 | -2.27817 |
| C | 0.70623  | 4.63776  | -1.19015 | F | -4.46337 | -1.67064 | 2.42774  |
| C | -5.85038 | -0.62858 | 1.12204  | F | -7.05214 | -2.58540 | 2.50003  |
| C | -5.73574 | 0.43321  | -1.00969 | F | 5.39723  | -1.40759 | -2.04219 |
| C | 0.78690  | 4.61719  | 1.19373  | F | -1.22831 | 4.14496  | 2.10856  |
| C | -7.11636 | 0.61003  | -1.00804 | F | 0.56511  | 4.27158  | -2.34208 |
| C | -7.23287 | -0.46812 | 1.14101  | F | 5.13077  | 0.69950  | 2.26692  |
| C | -7.86857 | 0.15562  | 0.07137  | F | 8.12791  | -1.28688 | -1.92242 |
| C | 0.84677  | 6.02159  | -1.19504 | F | 7.86092  | 0.82602  | 2.36433  |
| C | 0.92761  | 6.00075  | 1.21338  | F | -1.58815 | 6.85981  | 2.03357  |
| C | 0.95890  | 6.70418  | 0.01276  | F | 9.37680  | -0.16786 | 0.27653  |
| H | 0.43004  | -5.74085 | 0.02466  | F | 0.20728  | 6.98595  | -2.40214 |
| H | 4.70413  | 0.46001  | -0.09498 | F | -0.87211 | 8.29436  | -0.21892 |
| H | 2.95510  | -4.81873 | 0.02993  | N | 1.52313  | 0.81157  | -0.01038 |
| C | -2.95443 | -5.39561 | -0.11629 | N | 1.71758  | -1.83206 | -0.00760 |
| F | -2.00463 | -6.12095 | 0.61132  | N | -0.69648 | -2.15364 | -0.01392 |
| F | -4.20987 | -5.75864 | 0.35061  | N | -1.25583 | 0.43830  | -0.02876 |
| F | -2.86515 | -5.86641 | -1.42788 | C | -0.01629 | -3.35700 | -0.00113 |
| H | -4.78505 | -3.13409 | 0.00131  | C | 3.09168  | -1.70223 | 0.02987  |
| H | -4.14926 | 2.43036  | 0.12252  | C | 1.17858  | 2.16428  | -0.04361 |
| H | -1.95927 | 3.94469  | 0.08591  | C | -2.05322 | -2.39267 | 0.00678  |
| C | 3.72090  | 3.07120  | -0.12375 | C | 1.37189  | -3.16768 | -0.00605 |
| F | 5.09059  | 2.83396  | -0.17565 | C | -2.60334 | -0.01536 | -0.02967 |
| F | 3.41992  | 3.84852  | -1.24515 | C | -2.99602 | -1.36182 | 0.00116  |
| F | 3.51261  | 3.89273  | 0.98672  | C | -1.25309 | 1.83133  | -0.07132 |
|   |          |          |          | C | -0.96665 | -4.40923 | 0.02720  |
|   |          |          |          | C | -2.22142 | -3.81782 | 0.03093  |
|   |          |          |          | C | 2.93455  | 0.72437  | 0.02351  |
|   |          |          |          | C | -4.42506 | -1.79128 | 0.03532  |
|   |          |          |          | C | -6.42426 | -2.58751 | -1.11004 |

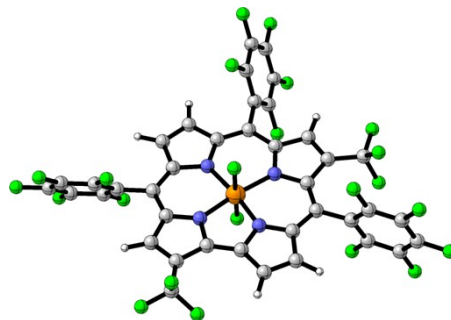

|   |          |          |          |   |          |          |          |
|---|----------|----------|----------|---|----------|----------|----------|
| C | -0.12247 | 2.65776  | -0.07659 |   |          |          |          |
| C | -0.32292 | 4.13473  | -0.11495 |   |          |          |          |
| C | -5.11357 | -2.12289 | -1.13516 |   |          |          |          |
| C | -2.60079 | 2.27392  | -0.10884 |   |          |          |          |
| C | 3.63431  | -3.01918 | 0.05008  |   |          |          |          |
| C | 3.70201  | -0.44033 | 0.05164  |   |          |          |          |
| C | -3.42198 | 1.17347  | -0.08122 |   |          |          |          |
| C | 2.57291  | -3.91958 | 0.03320  |   |          |          |          |
| C | 5.18541  | -0.35403 | 0.10711  |   |          |          |          |
| C | -6.41248 | -2.42902 | 1.29476  |   |          |          |          |
| C | -7.07511 | -2.73982 | 0.11093  |   |          |          |          |
| C | -5.10188 | -1.96585 | 1.24586  | P | -0.17640 | -0.32525 | 0.00852  |
| C | 2.38829  | 2.93402  | -0.02979 | F | -0.17465 | -0.30969 | -1.73353 |
| C | 3.44324  | 2.06635  | 0.00743  | F | -0.18537 | -0.32849 | 1.75029  |
| C | -0.86458 | 4.83291  | 0.97214  | F | 4.76191  | -0.41284 | 2.39744  |
| C | 5.98824  | -0.84857 | -0.93008 | F | 8.88163  | -0.24487 | -0.00548 |
| C | 5.85519  | 0.20175  | 1.20594  | F | 7.50756  | -0.31941 | 2.39114  |
| C | 0.02564  | 4.89507  | -1.23862 | F | 4.75090  | -0.35240 | -2.39272 |
| C | 7.24374  | 0.27226  | 1.27014  | F | 7.49649  | -0.25919 | -2.39674 |
| C | 7.37835  | -0.79472 | -0.88323 | F | -5.00901 | -2.04311 | 2.05818  |
| C | 8.00900  | -0.22998 | 0.22156  | F | 0.47591  | 4.64434  | -2.10987 |
| C | -1.05504 | 6.21170  | 0.94741  | F | -1.34901 | 4.43474  | 2.32565  |
| C | -0.14900 | 6.27549  | -1.28263 | F | -5.16492 | 0.06093  | -2.25757 |
| C | -0.69362 | 6.93603  | -0.18506 | F | -7.71530 | -2.43432 | 1.95536  |
| H | -0.73438 | -5.46096 | 0.05078  | F | -7.87128 | -0.32564 | -2.33887 |
| H | -3.17212 | -4.32581 | 0.05190  | F | 0.33476  | 7.37772  | -2.03131 |
| C | 2.68427  | -5.38776 | -0.03647 | F | -9.16309 | -1.57686 | -0.23881 |
| F | 1.66076  | -6.02089 | 0.67731  | F | -1.49477 | 7.16838  | 2.38743  |
| F | 2.59662  | -5.87924 | -1.33957 | F | -0.65239 | 8.65500  | 0.21349  |
| F | 3.89399  | -5.83552 | 0.47660  | N | -1.63038 | 0.85158  | 0.00959  |
| H | 4.68105  | -3.27321 | 0.08257  | N | -1.32554 | -1.78552 | -0.00220 |
| H | 4.49031  | 2.32035  | 0.01659  | N | 1.12693  | -1.66233 | 0.00190  |
| H | 2.43169  | 4.01036  | -0.04320 | N | 1.13182  | 0.99445  | 0.02398  |
| H | -2.92141 | 3.29952  | -0.15844 | C | 0.66066  | -2.96323 | -0.01374 |
| C | -4.89666 | 1.32389  | -0.11997 | C | -2.70275 | -1.91127 | -0.03442 |
| F | -5.54054 | 0.82168  | 1.01268  | C | -1.54385 | 2.24411  | 0.04095  |
| F | -5.49100 | 0.69851  | -1.21829 | C | 2.50932  | -1.65582 | -0.00810 |
| F | -5.24941 | 2.66638  | -0.20147 | C | -0.74164 | -3.03072 | -0.00876 |
|   |          |          |          | C | 2.52846  | 0.78298  | 0.02562  |
|   |          |          |          | C | 3.20621  | -0.43605 | 0.00509  |
|   |          |          |          | C | 0.90300  | 2.37153  | 0.06050  |
|   |          |          |          | C | 1.76336  | -3.83503 | -0.03665 |
|   |          |          |          | C | 2.90783  | -3.03969 | -0.03069 |
|   |          |          |          | C | -3.00256 | 0.50364  | -0.01947 |

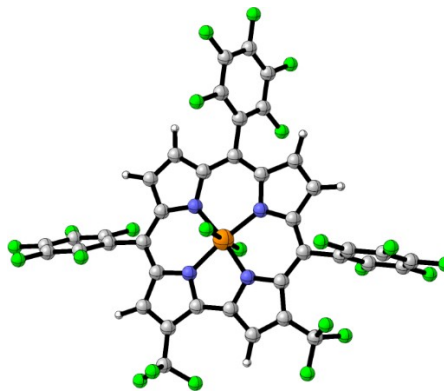

|   |          |          |          |   |          |          |          |
|---|----------|----------|----------|---|----------|----------|----------|
| C | 4.69764  | -0.39380 | 0.00227  |   |          |          |          |
| C | 6.81814  | -0.33280 | 1.20338  |   |          |          |          |
| C | -0.35420 | 2.97644  | 0.06891  |   |          |          |          |
| C | -0.43192 | 4.46431  | 0.10624  |   |          |          |          |
| C | 5.42806  | -0.38001 | 1.19411  |   |          |          |          |
| C | 2.17447  | 3.03236  | 0.08980  |   |          |          |          |
| C | -2.99159 | -3.30391 | -0.05743 |   |          |          |          |
| C | -3.53644 | -0.78425 | -0.04805 |   |          |          |          |
| C | 3.15126  | 2.07619  | 0.06469  |   |          |          |          |
| C | -1.78060 | -3.99287 | -0.04688 |   |          |          |          |
| C | -5.01057 | -0.97716 | -0.09519 |   |          |          |          |
| C | 6.81253  | -0.30224 | -1.20665 | P | 0.00001  | 0.17822  | -0.00003 |
| C | 7.51146  | -0.29514 | -0.00299 | F | -0.01811 | 0.16036  | 1.74136  |
| C | 5.42239  | -0.34941 | -1.19228 | F | 0.01812  | 0.16014  | -1.74143 |
| C | -2.87440 | 2.77522  | 0.03121  | F | 4.99430  | -0.46217 | -2.19424 |
| C | -3.75117 | 1.72619  | -0.00149 | F | 9.03099  | 0.94852  | -0.08224 |
| C | -0.01770 | 5.25125  | -0.97623 | F | 7.71841  | -0.21216 | -2.22096 |
| C | -5.70047 | -1.60902 | 0.94850  | F | 4.86199  | 1.59850  | 2.14236  |
| C | -5.77787 | -0.55984 | -1.19133 | F | 7.58695  | 1.85330  | 2.09509  |
| C | -0.92369 | 5.14736  | 1.22614  | F | -4.86239 | 1.59846  | -2.14186 |
| C | -7.15548 | -0.75043 | -1.24720 | F | 0.85738  | -4.70925 | 2.24180  |
| C | -7.07652 | -1.81530 | 0.91021  | F | -0.85743 | -4.70883 | -2.24221 |
| C | -7.80753 | -1.38255 | -0.19235 | F | -4.99385 | -0.46209 | 2.19482  |
| C | -0.08234 | 6.64169  | -0.94997 | F | -7.58734 | 1.85326  | -2.09407 |
| C | -1.00514 | 6.53633  | 1.27117  | F | -7.71796 | -0.21207 | 2.22206  |
| C | -0.58035 | 7.28672  | 0.17847  | F | 0.85950  | -7.44752 | 2.23346  |
| H | 1.72610  | -4.91058 | -0.06241 | F | -9.03096 | 0.94854  | 0.08357  |
| C | -1.61937 | -5.45631 | 0.01996  | F | -0.85966 | -7.44711 | -2.23434 |
| F | -0.49586 | -5.88824 | -0.69397 | F | -0.00011 | -8.83165 | -0.00056 |
| F | -1.44378 | -5.92638 | 1.32201  | N | -1.38462 | -1.08641 | -0.01034 |
| F | -2.72549 | -6.11798 | -0.49559 | N | -1.21568 | 1.58087  | -0.01346 |
| H | -3.97301 | -3.74792 | -0.08793 | N | 1.21571  | 1.58085  | 0.01321  |
| H | -4.82723 | 1.78207  | -0.00717 | N | 1.38462  | -1.08643 | 0.01041  |
| H | -3.11697 | 3.82472  | 0.04410  | C | 0.70786  | 2.87283  | -0.00101 |
| H | 2.31075  | 4.10024  | 0.12965  | C | -2.59540 | 1.60930  | 0.00965  |
| H | 4.21688  | 2.23539  | 0.07590  | C | -1.22369 | -2.47326 | -0.01357 |
| C | 4.26996  | -3.61308 | -0.05228 | C | 2.59543  | 1.60927  | -0.00970 |
| F | 5.01675  | -3.22126 | -1.16890 | C | -0.70782 | 2.87283  | 0.00043  |
| F | 5.03766  | -3.25521 | 1.06161  | C | 2.77244  | -0.81617 | 0.01106  |
| F | 4.22692  | -4.99977 | -0.07293 | C | 3.36910  | 0.44052  | -0.00516 |
|   |          |          |          | C | 1.22367  | -2.47328 | 0.01353  |
|   |          |          |          | C | 1.82979  | 3.75226  | -0.05061 |
|   |          |          |          | C | 2.98096  | 2.97119  | -0.04736 |
|   |          |          |          | C | -2.77244 | -0.81614 | -0.01077 |

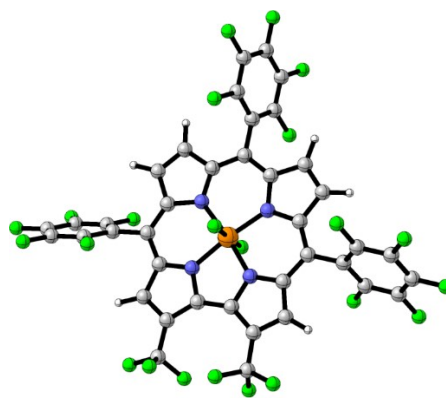

|   |          |          |          |   |          |          |          |
|---|----------|----------|----------|---|----------|----------|----------|
| C | 4.85189  | 0.55983  | -0.02363 |   |          |          |          |
| C | 7.00397  | 0.23699  | -1.13807 |   |          |          |          |
| C | -0.00001 | -3.14321 | -0.00009 |   |          |          |          |
| C | -0.00003 | -4.63370 | -0.00020 |   |          |          |          |
| C | 5.61766  | 0.11601  | -1.11009 |   |          |          |          |
| C | 2.52412  | -3.07593 | 0.02227  |   |          |          |          |
| C | -2.98091 | 2.97123  | 0.04707  |   |          |          |          |
| C | -3.36908 | 0.44055  | 0.00542  |   |          |          |          |
| C | 3.45613  | -2.07631 | 0.02613  |   |          |          |          |
| C | -1.82972 | 3.75230  | 0.04999  | P | 0.56836  | -0.85374 | -0.02125 |
| C | -4.85187 | 0.55987  | 0.02416  | F | 0.58021  | -0.83108 | -1.76247 |
| C | 6.93752  | 1.28024  | 1.03053  | F | 0.55118  | -0.82449 | 1.71970  |
| C | 7.66660  | 0.82342  | -0.06361 | F | 5.56653  | -0.66034 | 2.26561  |
| C | 5.55231  | 1.14379  | 1.04066  | F | 9.51212  | -2.41730 | 0.24285  |
| C | -2.52414 | -3.07591 | -0.02213 | F | 8.25811  | -1.14042 | 2.35075  |
| C | -3.45614 | -2.07628 | -0.02577 | F | 5.35189  | -2.71835 | -2.06995 |
| C | 0.42528  | -5.37006 | 1.11302  | F | 8.04161  | -3.20502 | -1.96251 |
| C | -5.55249 | 1.14379  | -1.04002 | F | -4.28148 | -0.80117 | 2.41933  |
| C | -5.61743 | 0.11607  | 1.11078  | F | 1.89588  | 3.87349  | -2.32181 |
| C | -0.42536 | -5.36985 | -1.11355 | F | 0.10917  | 4.10925  | 2.12688  |
| C | -7.00373 | 0.23705  | 1.13903  | F | -4.47223 | -0.97011 | -2.35927 |
| C | -6.93771 | 1.28024  | -1.02962 | F | -7.02598 | -0.89955 | 2.53456  |
| C | -7.66657 | 0.82345  | 0.06468  | F | -7.21667 | -1.06784 | -2.24793 |
| C | 0.43348  | -6.76216 | 1.12255  | F | 2.14220  | 6.60085  | -2.36058 |
| C | -0.43362 | -6.76195 | -1.12332 | F | -8.49836 | -1.03246 | 0.19974  |
| C | -0.00008 | -7.46097 | -0.00044 | F | 0.35422  | 6.83748  | 2.07359  |
| C | -1.89209 | 5.23137  | 0.07446  | F | 1.37187  | 8.09722  | -0.16720 |
| F | -0.98043 | 5.78811  | 0.96091  | N | -0.72232 | 0.51138  | -0.04063 |
| F | -1.67116 | 5.81263  | -1.16955 | N | -0.77061 | -2.14268 | -0.02764 |
| F | -3.16044 | 5.65320  | 0.47785  | N | 1.67467  | -2.34067 | -0.01003 |
| H | -3.99002 | 3.34488  | 0.08625  | N | 2.06845  | 0.27323  | -0.01072 |
| H | -4.52769 | -2.18839 | -0.03984 | C | 1.05497  | -3.57253 | -0.00969 |
| H | -2.70862 | -4.13721 | -0.02111 | C | -2.15177 | -2.09030 | -0.01918 |
| H | 2.70859  | -4.13724 | 0.02121  | C | -0.40927 | 1.86995  | -0.07406 |
| H | 4.52768  | -2.18845 | 0.04039  | C | 3.04448  | -2.52032 | 0.02558  |
| H | 3.99008  | 3.34482  | -0.08649 | C | -0.33878 | -3.45569 | -0.02123 |
| C | 1.89213  | 5.23132  | -0.07544 | C | 3.42572  | -0.12092 | 0.02096  |
| F | 3.16047  | 5.65305  | -0.47896 | C | 3.91626  | -1.42972 | 0.04522  |
| F | 1.67125  | 5.81290  | 1.16844  | C | 2.03337  | 1.66797  | -0.03622 |
| F | 0.98043  | 5.78780  | -0.96199 | C | 2.05139  | -4.58031 | 0.02319  |
|   |          |          |          | C | 3.27911  | -3.93304 | 0.04691  |
|   |          |          |          | C | -2.13654 | 0.36259  | -0.05110 |
|   |          |          |          | C | 5.38298  | -1.67229 | 0.09348  |
|   |          |          |          | C | 7.53128  | -1.52977 | 1.25301  |

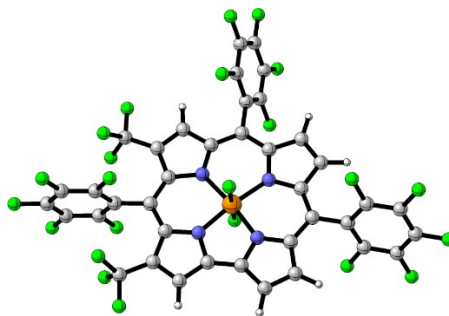

|   |          |          |          |   |          |          |          |
|---|----------|----------|----------|---|----------|----------|----------|
| C | 0.86911  | 2.43267  | -0.06901 |   |          |          |          |
| C | 0.99462  | 3.91819  | -0.09637 |   |          |          |          |
| C | 6.16116  | -1.29148 | 1.19510  |   |          |          |          |
| C | 3.37940  | 2.15330  | -0.01891 |   |          |          |          |
| C | -2.58887 | -3.47215 | -0.00965 |   |          |          |          |
| C | -2.83120 | -0.85809 | -0.02311 |   |          |          |          |
| C | 4.21788  | 1.07219  | 0.01151  |   |          |          |          |
| C | -1.46535 | -4.29375 | -0.01277 |   |          |          |          |
| C | -4.32234 | -0.87641 | 0.02689  |   |          |          |          |
| C | 7.42170  | -2.57201 | -0.91382 | P | -0.37432 | -1.03127 | 0.00083  |
| C | 8.16418  | -2.17471 | 0.19430  | F | -0.35289 | -1.02776 | 1.74226  |
| C | 6.05368  | -2.31779 | -0.95416 | F | -0.36594 | -1.00750 | -1.74063 |
| C | -1.62473 | 2.59854  | -0.11783 | F | -5.40624 | -0.83571 | -2.18966 |
| C | -2.67109 | 1.71256  | -0.10197 | F | -9.30505 | -2.61958 | -0.10094 |
| C | 1.50396  | 4.59194  | -1.21383 | F | -8.09827 | -1.32038 | -2.22253 |
| C | -5.00086 | -0.86504 | 1.24871  | F | -5.09645 | -2.93420 | 2.12063  |
| C | -5.09502 | -0.94955 | -1.13415 | F | -7.78697 | -3.42525 | 2.06531  |
| C | 0.61721  | 4.70950  | 0.99626  | F | 4.53222  | -0.92940 | -2.43891 |
| C | -6.48269 | -0.99963 | -1.08853 | F | -0.89956 | 3.74847  | 2.48512  |
| C | -6.38665 | -0.91490 | 1.31845  | F | -0.98013 | 3.85114  | -2.30349 |
| C | -7.12894 | -0.98255 | 0.14333  | F | 4.58665  | -0.92752 | 2.35117  |
| C | 1.63635  | 5.97731  | -1.24693 | F | 7.27358  | -0.75020 | -2.46902 |
| C | 0.73408  | 6.09665  | 0.98246  | F | 7.32808  | -0.74847 | 2.31876  |
| C | 1.24778  | 6.73270  | -0.14417 | F | -1.44435 | 6.43910  | 2.55103  |
| H | -1.70741 | 3.66957  | -0.16627 | F | 8.67803  | -0.66107 | -0.09080 |
| H | 3.65873  | 3.19369  | -0.02625 | F | -1.52435 | 6.54196  | -2.23565 |
| H | 5.29521  | 1.08857  | 0.02107  | F | -1.75604 | 7.84374  | 0.19126  |
| H | 4.25113  | -4.39861 | 0.07773  | N | 0.89224  | 0.35571  | 0.00587  |
| H | -1.46596 | -5.37070 | -0.00920 | N | 0.97967  | -2.32342 | -0.01372 |
| H | 1.87567  | -5.64435 | 0.03051  | N | -1.46446 | -2.52956 | -0.00408 |
| C | -3.94946 | -4.05920 | -0.01301 | N | -1.86287 | 0.08199  | 0.01384  |
| C | -4.06387 | 2.22811  | -0.16715 | C | -0.83998 | -3.75962 | -0.01870 |
| F | -4.69745 | -3.72947 | -1.14580 | C | 2.36080  | -2.27202 | -0.02568 |
| F | -3.88121 | -5.44888 | 0.01281  | C | 0.62337  | 1.73527  | 0.02857  |
| F | -4.72557 | -3.68946 | 1.08759  | C | -2.83381 | -2.71338 | -0.01865 |
| F | -4.76747 | 1.79658  | -1.29191 | C | 0.55514  | -3.63823 | -0.02085 |
| F | -4.84393 | 1.90254  | 0.94186  | C | -3.22085 | -0.31381 | 0.01263  |
| F | -4.06055 | 3.61933  | -0.23211 | C | -3.70823 | -1.62295 | -0.01222 |
|   |          |          |          | C | -1.82086 | 1.47526  | 0.04869  |
|   |          |          |          | C | -1.83369 | -4.76949 | -0.04205 |
|   |          |          |          | C | -3.06447 | -4.12582 | -0.04426 |
|   |          |          |          | C | 2.28861  | 0.16470  | -0.01125 |
|   |          |          |          | C | -5.17522 | -1.86794 | -0.03176 |
|   |          |          |          | C | -7.34768 | -1.71845 | -1.14422 |

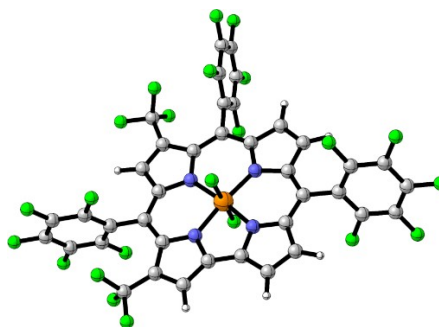



|   |          |          |          |   |          |          |          |
|---|----------|----------|----------|---|----------|----------|----------|
| C | -0.66897 | 2.26929  | 0.05395  |   |          |          |          |
| C | -0.90898 | 3.74379  | 0.08901  |   |          |          |          |
| C | -5.97705 | -1.47784 | -1.11301 |   |          |          |          |
| C | -3.17016 | 1.95817  | 0.07597  |   |          |          |          |
| C | 2.80628  | -3.64381 | -0.03764 |   |          |          |          |
| C | 3.01215  | -1.03395 | -0.02657 |   |          |          |          |
| C | -4.01086 | 0.87889  | 0.05543  |   |          |          |          |
| C | 1.68866  | -4.47327 | -0.03492 |   |          |          |          |
| C | 4.50112  | -0.93938 | -0.04321 |   |          |          |          |
| C | -7.19048 | -2.78109 | 1.00983  | P | -0.05369 | -1.00560 | -0.00263 |
| C | -7.95688 | -2.37469 | -0.07855 | F | -0.04724 | -1.00291 | -1.74424 |
| C | -5.82239 | -2.52467 | 1.02365  | F | -0.03030 | -0.98889 | 1.73876  |
| C | 1.90370  | 2.40725  | 0.02105  | F | 4.94893  | -1.39001 | 2.20711  |
| C | 2.88895  | 1.45334  | -0.00344 | F | 8.63730  | -3.59640 | 0.13888  |
| C | -1.04421 | 4.43044  | 1.29917  | F | 7.56885  | -2.18033 | 2.25943  |
| C | 5.21405  | -0.88790 | -1.24482 | F | 4.43880  | -3.41882 | -2.11656 |
| C | 5.24122  | -0.88715 | 1.14184  | F | 7.05602  | -4.21233 | -2.04392 |
| C | -1.08448 | 4.48149  | -1.08544 | F | -4.91658 | -0.34541 | 2.43899  |
| C | 6.62916  | -0.79629 | 1.13786  | F | 0.71282  | 3.76624  | -2.46563 |
| C | 6.60174  | -0.79711 | -1.27247 | F | 0.84734  | 3.80816  | 2.32269  |
| C | 7.31041  | -0.75229 | -0.07525 | F | -4.97324 | -0.34297 | -2.35166 |
| C | -1.32159 | 5.79258  | 1.34533  | F | -7.61813 | 0.15011  | 2.46985  |
| C | -1.36204 | 5.84425  | -1.06373 | F | -7.67480 | 0.15250  | -2.31807 |
| C | -1.47959 | 6.50114  | 0.15777  | F | 0.95572  | 6.50136  | -2.49543 |
| H | -3.44863 | 2.99785  | 0.10874  | F | -9.00449 | 0.39825  | 0.09208  |
| H | -5.08805 | 0.89704  | 0.07540  | F | 1.08914  | 6.54340  | 2.29095  |
| H | -4.03520 | -4.59474 | -0.06252 | F | 1.14655  | 7.89729  | -0.11778 |
| H | 1.69475  | -5.55061 | -0.04181 | N | -1.15419 | 0.48011  | -0.00475 |
| H | -1.65540 | -5.83305 | -0.05716 | N | -1.54095 | -2.13873 | 0.01012  |
| C | 4.18594  | -4.17442 | -0.05156 | N | 0.86467  | -2.61680 | 0.00037  |
| F | 4.94111  | -3.78023 | 1.05726  | N | 1.56636  | -0.03446 | -0.01632 |
| F | 4.18321  | -5.56354 | -0.05374 | C | 0.10604  | -3.76735 | 0.01244  |
| F | 4.92002  | -3.77726 | -1.17361 | C | -2.90689 | -1.93158 | 0.02200  |
| H | 3.94833  | 1.64067  | -0.01439 | C | -0.71897 | 1.80592  | -0.02464 |
| C | 2.24131  | 3.85016  | 0.03285  | C | 2.20486  | -2.95394 | 0.01883  |
| F | 1.78027  | 4.52417  | 1.16617  | C | -1.26785 | -3.49446 | 0.01427  |
| F | 1.74248  | 4.55042  | -1.06791 | C | 2.85605  | -0.60932 | -0.01403 |
| F | 3.62015  | 4.02863  | 0.01191  | C | 3.19103  | -1.97103 | 0.01509  |
|   |          |          |          | C | 1.69882  | 1.36264  | -0.05485 |
|   |          |          |          | C | 0.98058  | -4.88441 | 0.03685  |
|   |          |          |          | C | 2.27480  | -4.38519 | 0.04343  |
|   |          |          |          | C | -2.56627 | 0.47948  | 0.01281  |
|   |          |          |          | C | 4.62184  | -2.37832 | 0.04201  |
|   |          |          |          | C | 6.78747  | -2.48294 | 1.17264  |

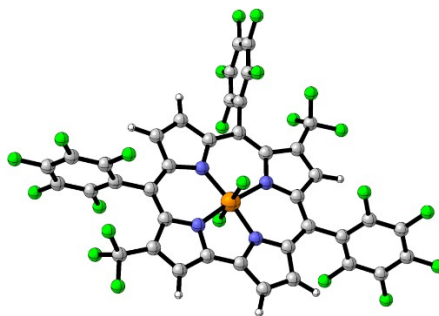

|   |          |          |          |   |          |          |          |
|---|----------|----------|----------|---|----------|----------|----------|
| C | 0.60568  | 2.24219  | -0.05204 |   |          |          |          |
| C | 0.79280  | 3.72470  | -0.07129 |   |          |          |          |
| C | 5.45366  | -2.08733 | 1.13190  |   |          |          |          |
| C | 3.11350  | 1.64743  | -0.08808 |   |          |          |          |
| C | -3.50399 | -3.24247 | 0.03090  |   |          |          |          |
| C | -3.41883 | -0.62379 | 0.02576  |   |          |          |          |
| C | 3.79250  | 0.45275  | -0.06316 |   |          |          |          |
| C | -2.48652 | -4.19518 | 0.02645  |   |          |          |          |
| C | -4.88732 | -0.36251 | 0.04297  |   |          |          |          |
| C | 6.52822  | -3.50931 | -0.98964 | P | 0.14163  | -0.78894 | 0.00008  |
| C | 7.32662  | -3.19855 | 0.10728  | F | 0.12310  | -0.76457 | 1.74123  |
| C | 5.19827  | -3.09911 | -1.01250 | F | 0.14672  | -0.76322 | -1.74115 |
| C | -1.88102 | 2.64995  | -0.01511 | F | -4.61820 | -2.08431 | -2.42800 |
| C | -2.98902 | 1.85180  | 0.00787  | F | -8.53454 | -3.39609 | -0.03792 |
| C | 0.81314  | 4.44140  | -1.27137 | F | -7.20550 | -3.00598 | -2.42967 |
| C | -5.58904 | -0.22761 | 1.24464  | F | -4.67337 | -1.94242 | 2.35975  |
| C | -5.61728 | -0.22650 | -1.14164 | F | -7.26054 | -2.86439 | 2.35652  |
| C | 0.87996  | 4.46235  | 1.11308  | F | 5.09340  | -0.43564 | -2.35169 |
| C | -6.98546 | 0.02433  | -1.13718 | F | -1.42234 | 3.90203  | 2.22545  |
| C | -6.95694 | 0.02317  | 1.27283  | F | 0.38608  | 4.16737  | -2.21292 |
| C | -7.65649 | 0.14820  | 0.07601  | F | 5.04688  | -0.41728 | 2.43912  |
| C | 0.93410  | 5.82675  | -1.29913 | F | 7.82033  | -0.10804 | -2.32508 |
| C | 1.00135  | 5.84792  | 1.10979  | F | 7.77385  | -0.08952 | 2.46293  |
| C | 1.02966  | 6.53121  | -0.10247 | F | -1.78978 | 6.61700  | 2.23084  |
| H | 4.86196  | 0.33782  | -0.08776 | F | 9.16784  | 0.06378  | 0.08156  |
| H | 3.18659  | -4.96033 | 0.06366  | F | 0.02064  | 6.88137  | -2.19262 |
| H | -2.61592 | -5.26474 | 0.03102  | F | -1.06997 | 8.12051  | 0.02505  |
| H | 0.68188  | -5.92061 | 0.05016  | N | 1.33915  | 0.63750  | 0.01031  |
| C | -4.93465 | -3.61259 | 0.04323  | N | 1.56079  | -2.00577 | 0.00924  |
| F | -5.64006 | -3.13469 | -1.06593 | N | -0.86472 | -2.32947 | -0.00710 |
| F | -5.09030 | -4.99309 | 0.04461  | N | -1.43126 | 0.26103  | -0.01208 |
| F | -5.62105 | -3.13505 | 1.16456  | C | -0.18382 | -3.52900 | -0.00061 |
| H | -4.01880 | 2.16866  | 0.01914  | C | 2.93688  | -1.88303 | 0.01962  |
| H | -1.85531 | 3.72646  | -0.02537 | C | 0.99543  | 1.99177  | 0.01921  |
| C | 3.84304  | 2.93509  | -0.15230 | C | -2.22279 | -2.56986 | -0.01558 |
| F | 5.21621  | 2.71596  | -0.19071 | C | 1.20403  | -3.34262 | 0.00780  |
| F | 3.61476  | 3.76757  | 0.94584  | C | -2.77783 | -0.19455 | -0.03631 |
| F | 3.54035  | 3.69374  | -1.28597 | C | -3.16757 | -1.54254 | -0.03013 |
|   |          |          |          | C | -1.43315 | 1.65464  | -0.01990 |
|   |          |          |          | C | -1.13255 | -4.58315 | -0.00389 |
|   |          |          |          | C | -2.38913 | -3.99514 | -0.01244 |
|   |          |          |          | C | 2.74732  | 0.54542  | 0.02829  |
|   |          |          |          | C | -4.59584 | -1.97625 | -0.03458 |
|   |          |          |          | C | -6.57408 | -2.73439 | -1.24052 |

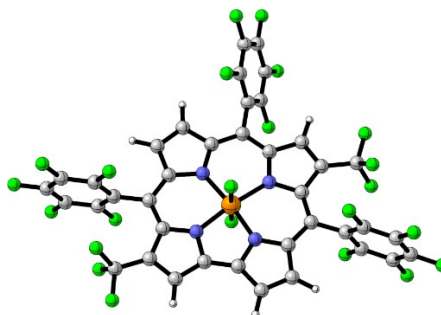

|   |          |          |          |   |          |          |          |
|---|----------|----------|----------|---|----------|----------|----------|
| C | -0.30448 | 2.48468  | 0.00201  |   |          |          |          |
| C | -0.50845 | 3.96150  | 0.00624  |   |          |          |          |
| C | -5.26428 | -2.26668 | -1.22736 |   |          |          |          |
| C | -2.78078 | 2.09517  | -0.05919 |   |          |          |          |
| C | 3.45177  | -3.22929 | 0.02352  |   |          |          |          |
| C | 3.52922  | -0.61047 | 0.02922  |   |          |          |          |
| C | -3.59941 | 0.99211  | -0.06793 |   |          |          |          |
| C | 2.37792  | -4.11706 | 0.01636  |   |          |          |          |
| C | 5.01128  | -0.44141 | 0.04310  |   |          |          |          |
| C | -6.60189 | -2.66293 | 1.16831  | P | 0.00001  | 0.46500  | -0.00007 |
| C | -7.24439 | -2.93199 | -0.03672 | F | -0.01075 | 0.46476  | -1.74171 |
| C | -5.29185 | -2.19577 | 1.15763  | F | 0.01074  | 0.46497  | 1.74156  |
| C | 2.20679  | 2.75852  | 0.04994  | F | -4.90222 | 0.76517  | 2.44193  |
| C | 3.25949  | 1.88779  | 0.05208  | F | -9.05340 | 0.85821  | 0.08968  |
| C | -1.05637 | 4.62507  | 1.11175  | F | -7.64877 | 0.81527  | 2.46931  |
| C | 5.74577  | -0.35489 | -1.14337 | F | -4.95153 | 0.79548  | -2.34837 |
| C | 5.72277  | -0.34607 | 1.24284  | F | -7.69802 | 0.84601  | -2.31860 |
| C | -0.15831 | 4.75604  | -1.09303 | F | 4.95147  | 0.79404  | 2.34848  |
| C | 7.10355  | -0.18008 | 1.26757  | F | -0.93380 | -4.40857 | -2.21138 |
| C | 7.12692  | -0.18926 | -1.14243 | F | 0.93376  | -4.40874 | 2.21110  |
| C | 7.80695  | -0.10278 | 0.06893  | F | 4.90234  | 0.76650  | -2.44184 |
| C | -1.25074 | 6.00340  | 1.12775  | F | 7.69795  | 0.84457  | 2.31884  |
| C | -0.33701 | 6.13668  | -1.09618 | F | 7.64888  | 0.81666  | -2.46909 |
| C | -0.88742 | 6.76239  | 0.01879  | F | -0.93592 | -7.14700 | -2.20318 |
| H | -3.33925 | -4.50467 | -0.01710 | F | 9.05342  | 0.85821  | -0.08937 |
| H | 2.44108  | -5.19260 | 0.01742  | F | 0.93584  | -7.14716 | 2.20271  |
| H | -0.90671 | -5.63769 | -0.00041 | F | -0.00005 | -8.53120 | -0.00029 |
| C | 4.85685  | -3.68725 | 0.03395  | N | 1.37895  | -0.78475 | -0.00978 |
| F | 5.57291  | -3.25195 | 1.15388  | N | 1.23396  | 1.86743  | -0.00815 |
| F | 4.92700  | -5.07463 | 0.03617  | N | -1.23394 | 1.86745  | 0.00785  |
| F | 5.58855  | -3.25473 | -1.07681 | N | -1.37896 | -0.78474 | 0.00976  |
| H | 4.30802  | 2.13517  | 0.07097  | C | -0.70157 | 3.13965  | 0.00440  |
| H | 2.25201  | 3.83466  | 0.07219  | C | 2.61637  | 1.93193  | -0.01970 |
| H | -3.10328 | 3.12104  | -0.08568 | C | 1.22384  | -2.17251 | -0.01680 |
| C | -5.07403 | 1.13966  | -0.11574 | C | -2.61636 | 1.93196  | 0.01961  |
| F | -5.72686 | 0.60013  | 0.99453  | C | 0.70159  | 3.13965  | -0.00479 |
| F | -5.65652 | 0.54717  | -1.23859 | C | -2.76279 | -0.50155 | 0.02910  |
| F | -5.43020 | 2.48284  | -0.15871 | C | -3.37606 | 0.75147  | 0.03059  |
|   |          |          |          | C | -1.22387 | -2.17249 | 0.01668  |
|   |          |          |          | C | -1.75678 | 4.06786  | 0.01285  |
|   |          |          |          | C | -2.94253 | 3.33415  | 0.02232  |
|   |          |          |          | C | 2.76279  | -0.50157 | -0.02906 |
|   |          |          |          | C | -4.86758 | 0.78796  | 0.04612  |
|   |          |          |          | C | -6.97391 | 0.81477  | 1.27321  |

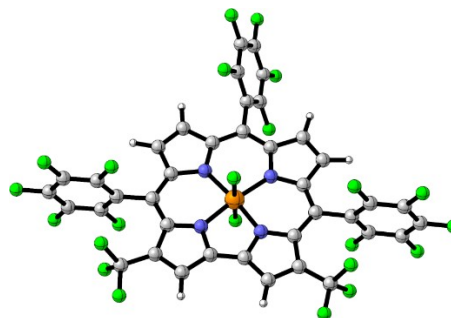

|   |          |          |          |   |          |          |          |
|---|----------|----------|----------|---|----------|----------|----------|
| C | -0.00001 | -2.84345 | -0.00009 |   |          |          |          |
| C | -0.00003 | -4.33369 | -0.00014 |   |          |          |          |
| C | -5.58347 | 0.78954  | 1.24686  |   |          |          |          |
| C | -2.52718 | -2.76653 | 0.04741  |   |          |          |          |
| C | 2.94256  | 3.33412  | -0.02230 |   |          |          |          |
| C | 3.37607  | 0.75143  | -0.03057 |   |          |          |          |
| C | -3.45268 | -1.76001 | 0.05197  |   |          |          |          |
| C | 1.75681  | 4.06784  | -0.01312 |   |          |          |          |
| C | 4.86759  | 0.78792  | -0.04602 | P | -0.55560 | -1.29140 | -0.04311 |
| C | -6.99869 | 0.83008  | -1.13687 | F | -0.47823 | -1.35239 | 1.69601  |
| C | -7.68263 | 0.83639  | 0.07538  | F | -0.59184 | -1.16032 | -1.77929 |
| C | -5.60790 | 0.80436  | -1.13960 | F | -5.53721 | -0.33359 | -2.13219 |
| C | 2.52716  | -2.76656 | -0.04742 | F | -9.62522 | -1.60634 | -0.03063 |
| C | 3.45266  | -1.76005 | -0.05198 | F | -8.27072 | -0.43577 | -2.13819 |
| C | -0.46381 | -5.06972 | -1.09820 | F | -5.47818 | -2.56182 | 2.12318  |
| C | 5.60787  | 0.80362  | 1.13973  | F | -8.21163 | -2.67077 | 2.09446  |
| C | 5.58353  | 0.79020  | -1.24673 | F | 4.37188  | -2.93124 | -2.27127 |
| C | 0.46375  | -5.06980 | 1.09787  | F | -1.15765 | 3.74477  | 2.31817  |
| C | 6.97398  | 0.81545  | -1.27301 | F | 0.31400  | 3.37966  | -2.22796 |
| C | 6.99866  | 0.82934  | 1.13707  | F | 4.24738  | -1.30214 | 2.23552  |
| C | 7.68265  | 0.83637  | -0.07515 | F | 7.00105  | -3.63790 | -1.93968 |
| C | -0.47216 | -6.46179 | -1.10759 | F | 6.87876  | -2.00433 | 2.55938  |
| C | 0.47209  | -6.46188 | 1.10717  | F | -1.30910 | 6.47053  | 2.04746  |
| C | -0.00004 | -7.16066 | -0.00024 | F | 8.26702  | -3.17417 | 0.47290  |
| H | 1.67232  | 5.14185  | -0.01295 | F | 0.16244  | 6.10522  | -2.49439 |
| H | -1.67227 | 5.14186  | 0.01268  | F | -0.64800 | 7.66221  | -0.35658 |
| C | 4.27180  | 3.98035  | -0.03296 | N | 0.92985  | -0.09489 | -0.01568 |
| F | 5.04046  | 3.64716  | -1.15313 | N | 0.57449  | -2.74198 | -0.16156 |
| F | 4.15140  | 5.36397  | -0.03488 | N | -1.85292 | -2.61726 | -0.06620 |
| F | 5.05612  | 3.65169  | 1.07757  | N | -1.87110 | 0.01655  | 0.06899  |
| H | 4.52503  | -1.86330 | -0.07174 | C | -1.40433 | -3.92606 | -0.12794 |
| H | 2.71861  | -3.82648 | -0.06831 | C | 1.94533  | -2.87231 | -0.17394 |
| H | -2.71865 | -3.82644 | 0.06833  | C | 0.83417  | 1.29272  | 0.15194  |
| H | -4.52505 | -1.86326 | 0.07174  | C | -3.23053 | -2.60942 | -0.04659 |
| C | -4.27177 | 3.98040  | 0.03326  | C | -0.01021 | -3.99464 | -0.16963 |
| F | -5.05608 | 3.65217  | -1.07743 | C | -3.27049 | -0.18356 | 0.05320  |
| F | -5.04042 | 3.64671  | 1.15327  | C | -3.94267 | -1.40583 | 0.00414  |
| F | -4.15137 | 5.36399  | 0.03572  | C | -1.62981 | 1.39044  | 0.11939  |
|   |          |          |          | C | -2.53260 | -4.78465 | -0.14424 |
|   |          |          |          | C | -3.65949 | -3.97538 | -0.09833 |
|   |          |          |          | C | 2.29382  | -0.45417 | -0.15122 |
|   |          |          |          | C | -5.42942 | -1.44021 | -0.00156 |
|   |          |          |          | C | -7.57184 | -0.96155 | -1.07977 |
|   |          |          |          | C | -0.38135 | 2.00764  | 0.16012  |

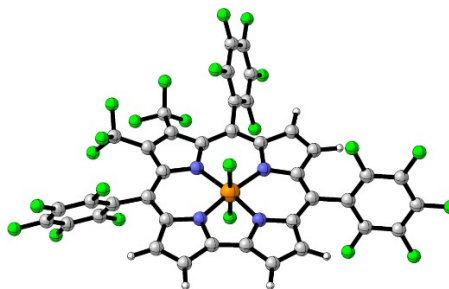

|   |          |          |          |   |          |          |          |
|---|----------|----------|----------|---|----------|----------|----------|
| C | -0.40486 | 3.49798  | 0.05563  |   |          |          |          |
| C | -6.18074 | -0.91634 | -1.06233 |   |          |          |          |
| C | -2.90198 | 2.05933  | 0.12646  |   |          |          |          |
| C | 2.22630  | -4.28406 | -0.18669 |   |          |          |          |
| C | 2.79964  | -1.77371 | -0.16866 |   |          |          |          |
| C | -3.88407 | 1.11161  | 0.10069  |   |          |          |          |
| C | 1.02422  | -4.96906 | -0.19376 |   |          |          |          |
| C | 4.25089  | -2.08543 | -0.03012 |   |          |          |          |
| C | -7.54208 | -2.08927 | 1.04625  |   |          |          |          |
| C | -8.25569 | -1.55264 | -0.02136 |   |          |          |          |
| C | -6.15155 | -2.02619 | 1.04696  | P | 0.12565  | -1.33888 | -0.00237 |
| C | 2.17111  | 1.80906  | 0.17842  | F | 0.13053  | -1.31057 | -1.74336 |
| C | 3.04013  | 0.76824  | -0.12932 | F | 0.14429  | -1.29296 | 1.73821  |
| C | -0.81929 | 4.31552  | 1.11221  | F | 5.13042  | -0.89428 | 2.20356  |
| C | 4.98024  | -2.68948 | -1.05995 | F | 9.12537  | -2.49841 | 0.14994  |
| C | 4.92023  | -1.87464 | 1.18000  | F | 7.84282  | -1.25323 | 2.25938  |
| C | -0.08692 | 4.13420  | -1.14865 | F | 4.95349  | -3.01569 | -2.10251 |
| C | 6.25438  | -2.22719 | 1.35734  | F | 7.66363  | -3.37906 | -2.02550 |
| C | 6.31329  | -3.05133 | -0.90500 | F | -4.76909 | -1.68958 | 2.44541  |
| C | 6.95329  | -2.81749 | 0.30972  | F | 0.12151  | 3.48756  | -2.47146 |
| C | -0.90121 | 5.69734  | 0.98734  | F | 0.25480  | 3.55389  | 2.31602  |
| C | -0.15932 | 5.51586  | -1.29687 | F | -4.83044 | -1.73794 | -2.34439 |
| C | -0.56778 | 6.29991  | -0.22339 | F | -7.47745 | -2.14333 | 2.48377  |
| H | 0.88353  | -6.03821 | -0.20903 | F | -7.53877 | -2.19190 | -2.30415 |
| H | -2.50701 | -5.86196 | -0.19027 | F | -0.06500 | 6.22772  | -2.50347 |
| H | -3.03547 | 3.12688  | 0.15620  | F | -8.87009 | -2.39300 | 0.10953  |
| H | -4.94781 | 1.28179  | 0.11649  | F | 0.06686  | 6.29398  | 2.28258  |
| H | -4.68691 | -4.30230 | -0.10072 | F | -0.09145 | 7.63803  | -0.12700 |
| H | 3.21308  | -4.71723 | -0.19586 | N | -1.23275 | -0.04298 | -0.00511 |
| C | 4.45363  | 0.97017  | -0.57188 | N | -1.13314 | -2.68329 | 0.01021  |
| C | 2.61774  | 3.14993  | 0.65973  | N | 1.29757  | -2.77857 | 0.00193  |
| F | 1.81112  | 3.60219  | 1.70672  | N | 1.57192  | -0.12037 | -0.01681 |
| F | 2.62370  | 4.15676  | -0.30290 | C | 0.72931  | -4.03952 | 0.01504  |
| F | 3.89966  | 3.09391  | 1.18778  | C | -2.50968 | -2.68706 | 0.02438  |
| F | 4.63663  | 2.23950  | -1.10102 | C | -0.98349 | 1.32740  | -0.02743 |
| F | 4.78802  | 0.09192  | -1.60531 | C | 2.67151  | -2.89839 | 0.02193  |
| F | 5.41625  | 0.80334  | 0.42018  | C | -0.66742 | -3.98597 | 0.01640  |
|   |          |          |          | C | 2.93547  | -0.48142 | -0.01292 |
|   |          |          |          | C | 3.48832  | -1.76977 | 0.01839  |
|   |          |          |          | C | 1.47834  | 1.28065  | -0.05887 |
|   |          |          |          | C | 1.77373  | -5.00085 | 0.04167  |
|   |          |          |          | C | 2.97043  | -4.30102 | 0.04865  |
|   |          |          |          | C | -2.63863 | -0.25430 | 0.01417  |
|   |          |          |          | C | 4.96560  | -1.94079 | 0.04716  |

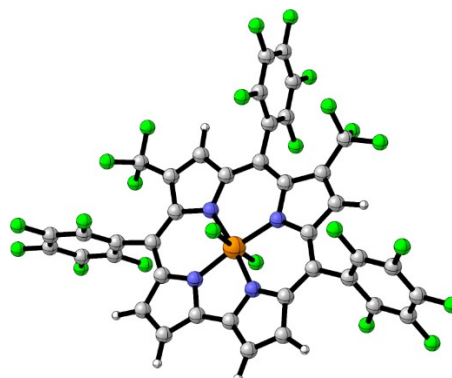

|   |          |          |          |   |          |          |          |
|---|----------|----------|----------|---|----------|----------|----------|
| C | 7.12038  | -1.68679 | 1.17601  |   |          |          |          |
| C | 0.26173  | 1.96823  | -0.05681 |   |          |          |          |
| C | 0.21013  | 3.46202  | -0.07752 |   |          |          |          |
| C | 5.74034  | -1.51106 | 1.13347  |   |          |          |          |
| C | 2.83086  | 1.78864  | -0.09338 |   |          |          |          |
| C | -2.92128 | -4.06202 | 0.03654  |   |          |          |          |
| C | -3.26166 | -1.50975 | 0.02881  |   |          |          |          |
| C | 3.69043  | 0.71885  | -0.06510 |   |          |          |          |
| C | -1.78579 | -4.85860 | 0.03175  |   |          |          |          |
| C | -4.74348 | -1.68565 | 0.04952  | P | 0.00005  | -1.13718 | -0.00118 |
| C | 7.02963  | -2.76044 | -0.97666 | F | -0.01438 | -1.08591 | 1.73897  |
| C | 7.76773  | -2.31606 | 0.11644  | F | 0.01446  | -1.08406 | -1.74129 |
| C | 5.65120  | -2.56861 | -1.00167 | F | -4.90068 | -1.79747 | -2.42274 |
| C | -2.23686 | 1.99874  | -0.01802 | F | -8.95649 | -2.53100 | -0.01833 |
| C | -3.23707 | 1.06034  | 0.00738  | F | -7.58939 | -2.35625 | -2.41407 |
| C | 0.11624  | 4.17190  | -1.27818 | F | -4.93018 | -1.59030 | 2.36332  |
| C | -5.44479 | -1.80504 | 1.25289  | F | -7.61883 | -2.14913 | 2.36994  |
| C | -5.47534 | -1.82924 | -1.13283 | F | 4.93309  | -1.59144 | -2.36246 |
| C | 0.18246  | 4.20503  | 1.10643  | F | -0.90228 | 3.72590  | 2.22322  |
| C | -6.84695 | -2.05984 | -1.12491 | F | 0.90209  | 3.72629  | -2.22402 |
| C | -6.81611 | -2.03532 | 1.28475  | F | 4.89791  | -1.79602 | 2.42366  |
| C | -7.51862 | -2.16209 | 0.08989  | F | 7.62171  | -2.15052 | -2.36561 |
| C | 0.01931  | 5.55906  | -1.30691 | F | 7.58662  | -2.35500 | 2.41847  |
| C | 0.08582  | 5.59247  | 1.10219  | F | -0.90166 | 6.46577  | 2.21690  |
| C | 0.00525  | 6.27068  | -0.11067 | F | 8.95651  | -2.53118 | 0.02446  |
| H | -1.74662 | -5.93639 | 0.03841  | F | 0.90141  | 6.46617  | -2.21722 |
| H | 1.64564  | -6.07167 | 0.05616  | F | -0.00013 | 7.84936  | -0.00005 |
| H | 4.76451  | 0.77538  | -0.08994 | N | 1.41740  | 0.11763  | 0.01377  |
| H | 3.96273  | -4.72218 | 0.07047  | N | 1.21360  | -2.52190 | 0.00714  |
| H | -3.94549 | -4.39858 | 0.04822  | N | -1.21343 | -2.52198 | -0.01096 |
| C | -4.66296 | 1.46659  | 0.02206  | N | -1.41739 | 0.11754  | -0.01496 |
| F | -4.77754 | 2.85177  | 0.01016  | C | -0.69856 | -3.80701 | -0.00677 |
| F | -5.35564 | 1.02866  | 1.15301  | C | 2.58902  | -2.57665 | 0.01479  |
| F | -5.38513 | 1.00715  | -1.08165 | C | 1.22787  | 1.49879  | 0.02517  |
| H | -2.37304 | 3.06528  | -0.02928 | C | -2.58883 | -2.57682 | -0.01753 |
| C | 3.34701  | 3.17587  | -0.16273 | C | 0.69885  | -3.80695 | 0.00136  |
| F | 2.92574  | 3.87280  | -1.29786 | C | -2.81237 | -0.14995 | -0.03956 |
| F | 2.99204  | 3.96447  | 0.93385  | C | -3.38584 | -1.43004 | -0.03094 |
| F | 4.73750  | 3.17689  | -0.20386 | C | -1.22796 | 1.49870  | -0.02622 |
|   |          |          |          | C | -1.78446 | -4.72068 | -0.01010 |
|   |          |          |          | C | -2.94841 | -3.96722 | -0.01556 |
|   |          |          |          | C | 2.81239  | -0.14977 | 0.03889  |
|   |          |          |          | C | -4.85982 | -1.66364 | -0.03055 |
|   |          |          |          | C | -6.92517 | -2.15890 | -1.22799 |

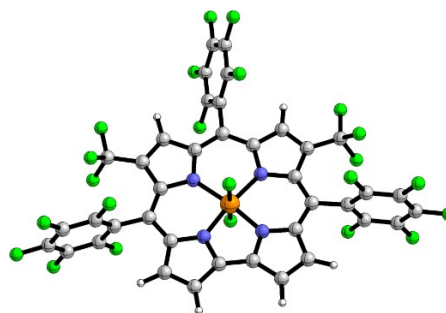

|   |          |          |          |   |          |          |          |
|---|----------|----------|----------|---|----------|----------|----------|
| C | -0.00007 | 2.16180  | -0.00052 |   |          |          |          |
| C | -0.00011 | 3.65333  | -0.00041 |   |          |          |          |
| C | -5.56369 | -1.87471 | -1.21984 |   |          |          |          |
| C | -2.50377 | 2.12004  | -0.06989 |   |          |          |          |
| C | 2.94869  | -3.96702 | 0.01169  |   |          |          |          |
| C | 3.38593  | -1.42983 | 0.02995  |   |          |          |          |
| C | -3.46435 | 1.14007  | -0.07669 |   |          |          |          |
| C | 1.78481  | -4.72056 | 0.00449  |   |          |          |          |
| C | 4.85992  | -1.66349 | 0.03137  |   |          |          |          |
| C | -6.94009 | -2.05438 | 1.17960  |   |          |          |          |
| C | -7.61485 | -2.24784 | -0.02222 | P | -0.00884 | -1.52240 | 0.03982  |
| C | -5.57837 | -1.77127 | 1.16377  | F | 0.00601  | -1.40993 | 1.77707  |
| C | 2.50361  | 2.12020  | 0.06928  | F | -0.02420 | -1.59011 | -1.70063 |
| C | 3.46427  | 1.14030  | 0.07638  | F | -4.96035 | -1.00311 | -2.22436 |
| C | -0.44793 | 4.38867  | 1.10466  | F | -9.03810 | -2.32391 | -0.13205 |
| C | 5.57985  | -1.77183 | -1.16206 | F | -7.68529 | -1.25065 | -2.29121 |
| C | 5.56235  | -1.87394 | 1.22161  | F | -4.91214 | -2.89263 | 2.19147  |
| C | 0.44771  | 4.38887  | -1.10536 | F | -7.63459 | -3.14527 | 2.10410  |
| C | 6.92380  | -2.15823 | 1.23151  | F | 4.79748  | -3.15073 | -2.10368 |
| C | 6.94157  | -2.05507 | -1.17612 | F | 0.18667  | 3.13473  | 2.43801  |
| C | 7.61489  | -2.24792 | 0.02660  | F | -0.14893 | 3.55648  | -2.31806 |
| C | -0.45535 | 5.78070  | 1.11460  | F | 5.03490  | -0.81305 | 2.08558  |
| C | 0.45511  | 5.78089  | -1.11505 | F | 7.52031  | -3.41723 | -2.09984 |
| C | -0.00012 | 6.47926  | -0.00016 | F | 7.75918  | -1.07595 | 2.06819  |
| H | 1.70569  | -5.79618 | 0.00139  | F | 0.22262  | 5.87235  | 2.68027  |
| H | -1.70528 | -5.79630 | -0.00823 | F | 9.01765  | -2.37990 | -0.01997 |
| H | -3.95932 | -4.34198 | -0.01920 | F | -0.10445 | 6.29263  | -2.07903 |
| H | 3.95964  | -4.34170 | 0.01577  | F | 0.07974  | 7.45586  | 0.41989  |
| C | 4.90471  | 1.48757  | 0.12889  | N | 1.38327  | -0.26815 | -0.04220 |
| F | 5.07365  | 2.86653  | 0.18469  | N | 1.20542  | -2.92861 | 0.10357  |
| F | 5.62643  | 1.05299  | -0.98480 | N | -1.23202 | -2.92006 | 0.11822  |
| F | 5.56160  | 0.96999  | 1.24762  | N | -1.39269 | -0.25627 | -0.01126 |
| H | 2.68236  | 3.18054  | 0.10008  | C | -0.71597 | -4.20039 | 0.18740  |
| H | -2.68256 | 3.18037  | -0.10063 | C | 2.58249  | -3.00483 | 0.09353  |
| C | -4.90482 | 1.48723  | -0.12916 | C | 1.23698  | 1.12786  | -0.10965 |
| F | -5.62641 | 1.05308  | 0.98483  | C | -2.60923 | -2.98850 | 0.08883  |
| F | -5.07384 | 2.86614  | -0.18546 | C | 0.68151  | -4.20482 | 0.18722  |
| F | -5.56179 | 0.96915  | -1.24758 | C | -2.76904 | -0.56604 | -0.00726 |
|   |          |          |          | C | -3.37670 | -1.82833 | 0.02093  |
|   |          |          |          | C | -1.23817 | 1.14114  | -0.01433 |
|   |          |          |          | C | -1.79627 | -5.12027 | 0.20827  |
|   |          |          |          | C | -2.96452 | -4.37592 | 0.14397  |
|   |          |          |          | C | 2.75708  | -0.58784 | -0.07840 |
|   |          |          |          | C | -4.85974 | -1.93710 | -0.01330 |

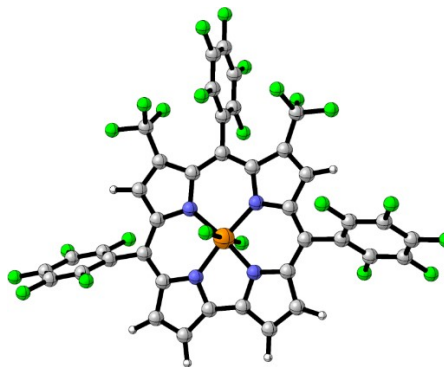

|   |          |          |          |
|---|----------|----------|----------|
| C | -6.99148 | -1.65423 | -1.17807 |
| C | 0.00332  | 1.79931  | -0.04753 |
| C | 0.01972  | 3.28956  | 0.05345  |
| C | -5.60565 | -1.53452 | -1.12977 |
| C | -2.57857 | 1.70003  | 0.00059  |
| C | 2.92952  | -4.39242 | 0.18478  |
| C | 3.35730  | -1.85135 | 0.00053  |
| C | -3.47479 | 0.66041  | -0.00218 |
| C | 1.75638  | -5.12985 | 0.23952  |
| C | 4.84001  | -1.96954 | -0.01108 |
| C | -6.96558 | -2.61185 | 1.03047  |
| C | -7.67431 | -2.19703 | -0.09324 |
| C | -5.58049 | -2.47728 | 1.06034  |
| C | 2.57722  | 1.67381  | -0.22933 |
| C | 3.46741  | 0.62919  | -0.20832 |
| C | 0.11282  | 3.91056  | 1.30340  |
| C | 5.51365  | -2.62562 | -1.05022 |
| C | 5.63256  | -1.46020 | 1.02679  |
| C | -0.05312 | 4.11756  | -1.06796 |
| C | 7.01865  | -1.58671 | 1.03178  |
| C | 6.89813  | -2.76876 | -1.06200 |
| C | 7.65404  | -2.24551 | -0.01702 |
| C | 0.13215  | 5.29140  | 1.43817  |
| C | -0.03226 | 5.50293  | -0.95713 |
| C | 0.06025  | 6.08961  | 0.30039  |
| H | 1.66364  | -6.20214 | 0.30928  |
| H | -1.71011 | -6.19412 | 0.26005  |
| H | -3.97272 | -4.75800 | 0.13663  |
| H | 3.93578  | -4.77924 | 0.20392  |
| H | -4.54569 | 0.75731  | 0.00830  |
| H | 4.53577  | 0.71493  | -0.29638 |
| C | 3.08814  | 3.05385  | -0.43778 |
| C | -3.09328 | 3.09418  | -0.01785 |
| F | -2.67424 | 3.87711  | 1.05791  |
| F | -2.76369 | 3.79917  | -1.17580 |
| F | -4.48585 | 3.09299  | 0.03984  |
| F | 2.82703  | 3.93756  | 0.60926  |
| F | 4.47502  | 3.03717  | -0.57468 |
| F | 2.59823  | 3.65575  | -1.59729 |

\_\_\_\_\_END\_\_\_\_\_
